1 **Osteoblastic PLEKHO1 contributes to joint inflammation in rheumatoid arthritis**

2

3 Xiaojuan He<sup>1-4,10</sup>, Jin Liu<sup>1-3,10</sup>, Chao Liang<sup>1-3,10</sup>, Shaikh Atik Badshah<sup>1-3,10</sup>, Kang Zheng<sup>1,4,10</sup>, Lei Dang<sup>1-3,10</sup>,  
4 Baosheng Guo<sup>1-3</sup>, Defang Li<sup>1-3</sup>, Cheng Lu<sup>1,4</sup>, Qingqing Guo<sup>1,4</sup>, Danping Fan<sup>4</sup>, Yanqin Bian<sup>5</sup>, Hui Feng<sup>5</sup>,  
5 Lianbo Xiao<sup>5</sup>, Xiaohua Pan<sup>1,6</sup>, Cheng Xiao<sup>7</sup>, BaoTing Zhang<sup>8</sup>, Ge Zhang<sup>1-3\*</sup> & Aiping Lu<sup>1-3,9\*</sup>

6

7 <sup>1.</sup> Law Sau Fai Institute for Advancing Translational Medicine in Bone & Joint Diseases, School of  
8 Chinese Medicine, Hong Kong Baptist University, Hong Kong SAR, China.

9 <sup>2.</sup> Institute of Integrated Bioinformatics and Translational Science, School of Chinese Medicine, Hong  
10 Kong Baptist University, Hong Kong SAR, China.

11 <sup>3.</sup> Institute of Precision Medicine and Innovative Drug Discovery, Hong Kong Baptist University, Hong  
12 Kong SAR, China.

13 <sup>4.</sup> Institute of Basic Research in Clinical Medicine, China Academy of Chinese Medical Sciences, Beijing,  
14 China.

15 <sup>5.</sup> Institute of Arthritis Research, Shanghai Academy of Chinese Medical Sciences, Guanghua Integrative  
16 Medicine Hospital / Shanghai University of TCM, Shanghai, China.

17 <sup>6.</sup> Department of Orthopaedics and Traumatology, Bao'an Hospital Affiliated to Southern Medical  
18 University & Shenzhen 8th People Hospital, Shenzhen, China.

19 <sup>7.</sup> Institute of Clinical Medical Science, China-Japan Friendship Hospital, Beijing, China.

20 <sup>8.</sup> School of Chinese Medicine, Faculty of Medicine, The Chinese University of Hong Kong, Hong Kong  
21 SAR, China.

22 <sup>9.</sup> School of Basic Medical Sciences, Shanghai University of Traditional Chinese Medicine, Shanghai,  
23 China.

24 <sup>10.</sup> These authors contributed equally to this work.

25 \* Correspondence should be addressed to G.Z. ([zhangge@hkbu.edu.hk](mailto:zhangge@hkbu.edu.hk)) or A.L. ([aipinglu@hkbu.edu.hk](mailto:aipinglu@hkbu.edu.hk)).

26

27 **Abstract**

28 Osteoblasts participating in the inflammation regulation gradually obtain concerns. However, its  
29 role in joint inflammation of rheumatoid arthritis (RA) is largely unknown. Pleckstrin homology  
30 domain-containing family O member 1 (PLEKHO1) was previously identified as a negative regulator  
31 of osteogenic lineage activity. Here we demonstrated that PLEKHO1 was highly expressed in  
32 osteoblasts of articular specimens from RA patients and inflammatory arthritis mice. Genetic deletion  
33 of osteoblastic *Plekho1* ameliorated joint inflammation in mice with collagen-induced arthritis (CIA)  
34 and K/BxN serum-transfer arthritis (STA), whereas overexpressing *Plekho1* only within osteoblasts in  
35 CIA and STA mice demonstrated exacerbated local inflammation. Further *in vitro* studies indicated  
36 that PLEKHO1 was required for TRAF2-mediated RIP1 ubiquitination to activate NF- $\kappa$ B for inducing  
37 inflammatory cytokines production in osteoblasts. Moreover, osteoblastic PLEKHO1 inhibition  
38 improved joint inflammation and attenuated bone formation reduction in CIA mice and non-human  
39 primate arthritis model. These data strongly suggest that highly expressed PLEKHO1 in osteoblast  
40 mediates joint inflammation in RA. Targeting osteoblastic PLEKHO1 may exert dual therapeutic  
41 action of alleviating joint inflammation and promoting bone formation in RA.

42

43

44

## 45 **Introduction**

46 Rheumatoid arthritis (RA) is characterized by chronic inflammation and progressive bone  
47 destruction[1, 2]. Osteoblasts are well-known cell types to modulate bone formation. Interestingly,  
48 recent increasing line of evidence suggests that osteoblasts could produce proinflammatory  
49 molecules in response to bacterial challenge and contribute to inflammation through the recruitment  
50 of leukocytes to the sites of infection during bone diseases such as osteomyelitis[3, 4]. However,  
51 whether osteoblasts contribute to local joint inflammation in RA progression and which molecule  
52 event is involved in is largely unknown.

53  
54 Pleckstrin homology domain-containing family O member 1 (PLEKHO1, also known as casein  
55 kinase-2 interacting protein-1 (CKIP-1)) is a scaffold protein mediating the interactions with various  
56 proteins in multiple signaling pathways, including the osteogenic BMP (bone morphogenetic protein)  
57 signaling pathway and the inflammatory PI3K (phosphoinositide 3-kinase)-Akt pathways[5, 6].  
58 Accordingly, the *Plekho1* systemic knock out mice showed higher bone mass than their wide-type  
59 controls, indicating that PLEKHO1 may play a role in regulating bone formation[7]. In our previous  
60 studies, we further demonstrated that loss of PLEKHO1 in osteoblasts alleviated the age-related  
61 bone formation reduction, and osteoblast-targeted *Plekho1* siRNA inhibition could promote bone  
62 formation in aging and osteoporotic rodents[8, 9]. On the other hand, several recent studies have  
63 reported that PLEKHO1 was also involved in cytokine signaling in response to inflammation[10, 11].  
64 However, it remains unclear whether PLEKHO1 contributes to the local joint inflammation and  
65 reduction of bone formation in RA pathogenesis.

66

67 In this study, we found PLEKHO1 was highly expressed in osteoblasts of joint bone specimens  
68 from RA patients and collagen-induced arthritis (CIA) mice. By genetic approach, we found that  
69 deletion of osteoblastic *Plekho1* resulted in remarkable amelioration of local inflammation in CIA mice  
70 and K/BxN serum-transfer arthritis (STA) mice, whereas genetic overexpression of *Plekho1* only in  
71 osteoblasts of CIA mice and STA mice dramatically exacerbated joint inflammation. More importantly,  
72 we elucidated that PLEKHO1 was required for TRAF2-mediated RIP1 ubiquitination to activate  
73 nuclear factor- $\kappa$  B (NF- $\kappa$ B) for inducing inflammatory cytokines production in osteoblasts. Finally, we  
74 also found early inhibition of osteoblastic PLEKHO1 improved joint inflammation and promoted bone  
75 formation in CIA mice and the non-human primate arthritis model.

76

77 Together, this study uncovers a previously unrecognized role of osteoblastic PLEKHO1 in joint  
78 inflammation regulation during RA, and targeting osteoblastic PLEKHO1 could serve as a new  
79 pharmacological target with dual action of inflammation inhibition and bone formation augmentation in  
80 RA.

81

## 82 Results

### 83 Osteoblastic PLEKHO1 is upregulated in RA patients and CIA mice

84 To assess whether PLEKHO1 has a role in RA pathology, we firstly investigated the expression of  
85 PLEKHO1 *in vivo*. We collected the bone samples from the knee joint of fifteen RA patients and eight  
86 severe trauma (TM) patients underwent knee joint replacement surgery. Indeed, we observed high  
87 levels of PLEKHO1 in knee joint bone tissues from RA patients when compared to those from TM  
88 controls (**Fig. 1a, 1b**). Further, we detected the levels of PLEKHO1 in osteoblasts by  
89 immunofluorescence staining. We used anti-osteocalcin antibody to identify osteoblasts. The results  
90 showed an increase of colocalization of PLEKHO1 positive with osteocalcin (Ocn) positive in knee  
91 joint bone tissues from RA patients (**Fig. 1c**). Quantitatively, the percentage of cells co-expressing  
92 PLEKHO1 and Ocn in Ocn positive (Ocn<sup>+</sup>) cells of bone tissues from knee joint was also remarkably  
93 higher in RA patients compared to TM patients (**Fig. 1d**).

94 To further investigate the dynamic changes of osteoblastic PLEKHO1 in RA progression, we  
95 observed the time course changes in PLEKHO1 expression within osteoblasts in CIA mice, a classic  
96 animal model of RA. In line with the above findings in RA patients' bone specimens, we also found the  
97 percentage of cells co-expressing PLEKHO1 and Ocn in Ocn<sup>+</sup> cells was higher in bone tissues of  
98 ankle joint in the hind paws from CIA mice on day 49 after primary immunization compared to those  
99 normal controls (**Fig. 1e, 1f**). Then, we collected Ocn<sup>+</sup> cells of ankle joint from CIA group by laser  
100 capture micro-dissection (LCM) at different time point after immunization. Further real time PCR  
101 analysis indicated that the *Plekho1* mRNA level in Ocn<sup>+</sup> cells of ankle joint from CIA group was  
102 increased over time from day 28 and significantly higher than that in control group on day 35, 42 and  
103 49, respectively (**Fig. 1g**).

104 These data suggested that local inflammatory environment might lead to the aberrant upregulation  
105 of PLEKHO1 in osteoblasts of joint bone tissues. To test this hypothesis *in vitro*, we stimulated human  
106 osteoblast-like cell line MG-63 and mouse osteoblast-like cell line MC3T3E1 with the recombinant  
107 proinflammatory cytokines IL-1 $\beta$ , IL-6 and TNF- $\alpha$ , and found higher levels of *Plekho1* mRNA in these  
108 cells (**Fig. 1h**).

109

### 110 **Osteoblastic *Plekho1* deletion attenuates joint inflammation in inflammatory arthritis mice**

111 To test whether deletion of osteoblastic *Plekho1* would attenuate joint inflammation during  
112 inflammatory arthritis, we generated the heterozygous mice carrying the mutant allele with LoxP sites  
113 harboring exon 3 to exon 6 of *Plekho1* gene (*Plekho1<sup>fl/+</sup>*). These mice were then crossed with *Osx-Cre*  
114 mice to generate the osteoblast-specific *Plekho1* conditional knockout (*Plekho1<sub>osx</sub><sup>-/-</sup>*) mice  
115 (**Supplementary Fig. 1a-b**). Real time PCR analysis showed that the *Plekho1* mRNA level was  
116 hardly detected in *Ocn*<sup>+</sup> cells (osteoblasts) from *Plekho1<sub>osx</sub><sup>-/-</sup>* mice when compared to control  
117 littermates (hereafter WT mice, including *Plekho1<sup>fl/fl</sup>* mice, *Osx<sup>+/-</sup>;Plekho1<sup>fl/-</sup>* mice, and *Osx<sup>+/-</sup>* mice),  
118 whereas no significant difference in *Plekho1* mRNA level within *Ocn*<sup>-</sup> cells (non-osteoblasts) was  
119 found between *Plekho1<sub>osx</sub><sup>-/-</sup>* mice and WT mice (**Supplementary Fig. 1c**).

120 Subsequently, we examined the joint inflammation changes of *Plekho1<sub>osx</sub><sup>-/-</sup>* mice after induction  
121 with type II chicken collagen. We found that *Plekho1<sub>osx</sub><sup>-/-</sup>*-CIA mice showed obvious attenuation in  
122 joint inflammation. The arthritis score in *Plekho1<sub>osx</sub><sup>-/-</sup>*-CIA mice was significantly lower than that in WT  
123 mice from day 37 to day 49 after first immunization (**Fig. 2a**). Histological evaluation showed that the  
124 score for inflammation in ankle joint from the hind paws was significantly lower in *Plekho1<sub>osx</sub><sup>-/-</sup>*-CIA  
125 mice than that in WT-CIA mice on day 49 after primary immunization (**Fig. 2b, 2c**). Moreover, IL-1 $\beta$

126 and IL-6 levels in ankle joint of hind paws from *Plekho1<sub>osx</sub><sup>-/-</sup>*-CIA mice were also remarkably lower on  
127 day 49 when compared with the WT-CIA mice (**Fig. 2d**). As previous studies regarded that joint  
128 inflammation progression was mainly caused by the activated fibroblast-like synoviocytes (FLS) and  
129 immune cells including infiltrating lymphocytes and neutrophils[12], we then detected the cross-talk  
130 between osteoblasts and FLS, CD4+T lymphocytes as well as neutrophils by using an *in vitro*  
131 co-culture system which could experimentally simulate the temporo-spatial complexity of the *in vivo*  
132 cross-talk between osteoblasts and inflammatory cells in the joint. The osteoblasts were differentiated  
133 from the primary osteoblast precursor cells isolated from the calvarial bone of newborn *Plekho1<sub>osx</sub><sup>-/-</sup>*  
134 mice and WT littermates in osteogenic medium and confirmed to express osteocalcin. The FLS,  
135 CD4+T lymphocytes and neutrophils were obtained from WT mice by collagenase digestion and  
136 specific magnetic beads-based selection, respectively. Thereafter, the FLS, CD4+T lymphocytes or  
137 neutrophils were co-cultured with *Plekho1<sub>osx</sub><sup>-/-</sup>* or WT osteoblasts, respectively. After co-culture, the  
138 cells were collected for real time PCR analysis. The results showed that under TNF- $\alpha$  stimulation, the  
139 IL-1 $\beta$  and IL-6 mRNA levels in the CD4+T lymphocytes and FLS were remarkably decreased after  
140 co-culture with osteoblasts from *Plekho1<sub>osx</sub><sup>-/-</sup>* mice when compared with the control group (**Fig. 2e, 2f**).  
141 The migration of neutrophils was also inhibited after co-culture with osteoblasts from *Plekho1<sub>osx</sub><sup>-/-</sup>*  
142 mice (**Fig. 2g**). These novel results pointed to an important role of osteoblastic PLEKHO1 in  
143 modulating local inflammatory response in RA.

144 As our previous studies demonstrated that osteoblastic PLEKHO1 negatively regulated bone  
145 formation during aging-related bone loss and osteoporosis[8, 9], we consistently examined the bone  
146 phenotypes of *Plekho1<sub>osx</sub><sup>-/-</sup>*-CIA mice. MicroCT analysis showed a better organized architecture and a  
147 higher bone mass in *Plekho1<sub>osx</sub><sup>-/-</sup>*-CIA mice compared to WT-CIA mice on day 49 after primary

148 immunization, both in cortical bone and trabecular bone (**Supplementary Fig. 2a**). The values of  
149 bone mineral density (BMD), trabecular fraction (BV/TV), trabecular thickness (Tb.Th) and trabecular  
150 number (Tb.N) of the tibial bones were gradually decreased from baseline (day 0) in WT-CIA mice  
151 and *Plekho1<sub>osx</sub><sup>-/-</sup>*-CIA mice. However, *Plekho1<sub>osx</sub><sup>-/-</sup>*-CIA mice showed a slow decrease in these  
152 parameters on day 49 compared to the rapid decrease in the control mice (**Supplementary Fig. 2b**).  
153 Dynamic bone histomorphometric analysis showed a larger width between the xylenol and the calcein  
154 labeling bands in *Plekho1<sub>osx</sub><sup>-/-</sup>*-CIA mice compared to WT-CIA mice (**Supplementary Fig. 2c**). The  
155 values of mineral apposition rate (MAR), bone formation rate (BFR/BS), osteoblasts surface  
156 (Ob.S/BS) and osteoblast number (Ob.N/B.Pm) were also decreased slower in *Plekho1<sub>osx</sub><sup>-/-</sup>*-CIA mice  
157 than those in WT-CIA mice on day 49 after primary immunization. The values of osteoclasts surface  
158 (Oc.S/BS) and osteoclast number (Oc.N/B.Pm) showed a slower increase in *Plekho1<sub>osx</sub><sup>-/-</sup>*-CIA mice  
159 than those in WT-CIA mice on day 49 after primary immunization (**Supplementary Fig. 2d**). These  
160 results demonstrated that osteoblastic PLEKHO1 indeed negatively regulated bone formation in CIA  
161 mice as well.

162 In addition, to further evaluate the role of osteoblastic PLEKHO1 in local inflammation regulation  
163 during RA, we induced *Plekho1<sub>osx</sub><sup>-/-</sup>* mice with K/BxN serum, which developed an acute arthritis and  
164 was more sensitive in mice with C57BL/6 background. Of note, we again observed less joint  
165 inflammation in *Plekho1<sub>osx</sub><sup>-/-</sup>*-STA mice, which was reflected by lower arthritis score from day 8 and  
166 lower histological inflammation score in ankle joint of hind paws at day 12 in *Plekho1<sub>osx</sub><sup>-/-</sup>*-STA mice  
167 compared to the control mice (**Supplementary Fig. 3a-c**). Moreover, IL-1 $\beta$  and IL-6 levels in ankle  
168 joint of hind paws from *Plekho1<sub>osx</sub><sup>-/-</sup>*-STA mice were also remarkably lower on day 12 when compared  
169 with the WT-STA mice (**Supplementary Fig. 3d**).



170

171 **Overexpressing Plekho1 only in osteoblasts exacerbates joint inflammation in inflammatory**  
172 **arthritis mice**

173 To exclude the interference of PLEKHO1 in other cells, we created another mouse strain carrying  
174 the ROSA26-PCAG-STOP<sup>fl</sup>-*Plekho1*-eGFP allele, and crossed them with the *Osx*-Cre mice to  
175 generate the osteoblast-specific *Plekho1* overexpressing (*Plekho1*<sub>osx</sub> *Tg*) mice that overexpressing  
176 PLEKHO1 in osteoblasts. Then, we crossed *Plekho1*<sup>-/-</sup> mice with *Plekho1*<sub>osx</sub> *Tg* mice to obtain mice  
177 that express high *Plekho1* exclusively in osteoblasts (*Plekho1*<sup>-/-</sup>/*Plekho1*<sub>osx</sub> *Tg* mice) (**Supplementary**  
178 **Figure 4a, 4b**). Real time PCR analysis showed that *Plekho1*<sup>-/-</sup>/*Plekho1*<sub>osx</sub> *Tg* mice had remarkably  
179 higher *Plekho1* mRNA levels in *Ocn*<sup>+</sup> cells (osteoblasts), at the same time, had little *Plekho1* mRNA  
180 levels in *Ocn*<sup>-</sup> cells (non-osteoblasts) when compared to control littermates (hereafter WT mice,  
181 including *Osx*<sup>+/-</sup>/*Plekho1*<sup>fl/-</sup> mice and *Osx*<sup>+/-</sup>/*Plekho1*<sup>fl/fl</sup> mice). *Plekho1*<sup>-/-</sup> mice had hardly detected  
182 *Plekho1* mRNA levels in both *Ocn*<sup>+</sup> cells and *Ocn*<sup>-</sup> cells (**Supplementary Figure 4c**). Then, we  
183 induced these mice with CIA. We found that exclusively high PLEKHO1 expression in osteoblasts  
184 exacerbated the disease severity and joint inflammation progression, which were shown by increased  
185 arthritis score from day 35 after primary immunization and higher pathological inflammation score of  
186 ankle joint from the hind paws in *Plekho1*<sup>-/-</sup>/*Plekho1*<sub>osx</sub> *Tg*-CIA mice compared to WT-CIA mice on day  
187 49 after primary immunization (**Fig. 3a-c**). IL-1 $\beta$  and IL-6 levels in ankle joint of hind paws from  
188 *Plekho1*<sup>-/-</sup>/*Plekho1*<sub>osx</sub> *Tg*-CIA mice were also obviously higher when compared to WT-CIA mice on  
189 day 49 after primary immunization (**Fig. 3d**). In addition, we isolated primary osteoblast precursor  
190 cells from calvarial bone of newborn *Plekho1*<sub>osx</sub> *Tg* mice and WT littermates, these precursor cells  
191 were induced maturation for co-culture with CD4<sup>+</sup>T lymphocytes, FLS and neutrophils isolated from

192 WT mice, respectively, we found that under TNF- $\alpha$  stimulation, the IL-1 $\beta$  and IL-6 mRNA levels in  
193 CD4+T lymphocytes and FLS were higher after co-culture with osteoblasts from *Plekho1<sub>osx</sub> Tg* mice  
194 when compared with the control group (**Fig. 3e, 3f**). The migration of neutrophils was also enhanced  
195 after co-culture with osteoblasts from *Plekho1<sub>osx</sub> Tg* mice (**Fig. 3g**).

196 We also induced *Plekho1<sup>-/-</sup>/Plekho1<sub>osx</sub> Tg* mice with K/BxN serum. Consistently, we again  
197 observed more joint inflammation in *Plekho1<sup>-/-</sup>/Plekho1<sub>osx</sub> Tg-STA* mice, which was reflected by  
198 quicker increased arthritis score and higher histological inflammation score in the ankle joint of hind  
199 paws in *Plekho1<sup>-/-</sup>/Plekho1<sub>osx</sub> Tg-STA* mice compared to the control littermates (**Supplementary Fig.**  
200 **5a-c**). IL-1 $\beta$  and IL-6 levels in ankle joint of hind paws from *Plekho1<sup>-/-</sup>/Plekho1<sub>osx</sub> Tg-STA* mice were  
201 significantly higher on day 12 when compared with the WT-STA mice (**Supplementary Fig. 5d**).  
202 These results further demonstrated the important role of osteoblastic PLEKHO1 in modulating joint  
203 inflammation in RA.

204

### 205 **PLEKHO1 is required for TRAF2-mediated RIP1 ubiquitination to activate NF- $\kappa$ B for inducing** 206 **inflammatory cytokines production in osteoblasts**

207 Then, to detect whether PLEKHO1 could affect TNF- $\alpha$ -stimulated osteoblasts releasing  
208 inflammatory effectors so as to modulate inflammation, we used a mouse osteoblast-like cell line  
209 MC3T3E1. We found that after *Plekho1* silencing by *Plekho1* siRNA, the IL-1 $\beta$  and IL-6 production in  
210 supernatant of TNF- $\alpha$ -stimulated MC3T3E1 cells were remarkably lower than the random siRNA  
211 group (**Fig. 4a**). To further confirm it *in vivo*, we crossed hTNFtg mice, which could spontaneously  
212 develop arthritis at the age of four week due to the overexpressed human TNF transgene, with  
213 *Plekho1<sub>osx</sub><sup>-/-</sup>* mice to obtain *Plekho1<sub>osx</sub><sup>-/-</sup>/hTNFtg* mice. Notably, *Plekho1<sub>osx</sub><sup>-/-</sup>/hTNFtg* mice showed a

214 distinct alleviation of disease severity. The arthritis score in *Plekho1*<sup>osx<sup>-/-</sup></sup>/hTNFtg mice was  
215 significantly lower than that in hTNFtg mice from 7 week to 10 week after birth (**Supplementary**  
216 **Figure 6a**). Histological analysis also indicated that joint inflammation was significantly ameliorated in  
217 *Plekho1*<sup>osx<sup>-/-</sup></sup>/hTNFtg mice compared to hTNFtg mice, which were reflected by lower histological  
218 inflammation score at week 10 (**Supplementary Figure 6b, 6c**). These results implied that  
219 osteoblastic PLEKHO1 on joint inflammation regulation might be related with TNF- $\alpha$  involved signal  
220 mechanism. As previous studies have demonstrated that NF- $\kappa$ B signal pathway played an important  
221 role in TNF- $\alpha$  induced inflammatory cytokines production[13], we therefore detected the change of  
222 related proteins in this signal pathway after specifically silencing *Plekho1* by *Plekho1* siRNA. We  
223 found that IKK $\alpha$ / $\beta$  and p65 phosphorylation as well as RIP1 ubiquitination were inhibited under TNF- $\alpha$   
224 stimulation in *Plekho1*-silenced MC3T3E1 cells, although no significantly change on production of  
225 IKK $\beta$  and p65 (**Fig. 4b-d**).

226 Previous studies demonstrated that TNF- $\alpha$  up-regulated the expression of inflammatory mediators  
227 through TRAF2-mediated NF- $\kappa$ B activation in MC3T3E1 cells[14]. In addition, PLEKHO1 could  
228 interact with the member of TRAF family to regulate the downstream signal[6], we therefore  
229 hypothesized that PLEKHO1 might interact with TRAF2 to promote the activation of NF- $\kappa$ B signal  
230 pathways. TRAF2 contains a ring finger domain, a zinc finger domain, a TRAF N domain and a TRAF  
231 C domain[15-17]. To test whether TRAF2 could interact with PLEKHO1 and which domain in TRAF2  
232 was essential for their interaction, we constructed Myc-tagged full-length *Plekho1* (Myc-*Plekho1*),  
233 Flag-tagged full-length TRAF2 (Flag-TRAF2) and various TRAF2 truncated mutants including  
234 Flag- $\Delta$ Ring, Flag- $\Delta$ Ring-Zinc, Flag-TRAF N and Flag- $\Delta$ TRAF C (**Fig. 4e**). HEK293T cells were  
235 transfected with Myc-*Plekho1* and Flag-TRAF2 or truncated mutants. After immunoprecipitation using

236 anti-Flag antibody, we detected that TRAF2 could interact with PLEKHO1 (**Fig. 4f**, Lane 2). However,  
237 deletion of TRAF C domain ( $\Delta$ TRAF C) abolished the interaction between TRAF2 and PLEKHO1 (**Fig.**  
238 **4f**, Lane 6), whereas other truncated mutants ( $\Delta$ Ring,  $\Delta$ Ring-Zinc and TRAF C) maintained the  
239 binding with PLEKHO1 as that of full-length TRAF2 (**Fig. 4f**, Lane 3-5). In addition, PLEKHO1 is  
240 composed of an N-terminal pleckstrin homology (PH)-containing domain and a C-terminal leucine  
241 zipper (LZ)-containing domain[7, 18]. We also constructed Plekho1 truncated mutants (Myc- $\Delta$ PH,  
242 Myc-LZ and Myc- $\Delta$ LZ) to identify the key domain in PLEKHO1 that interacted with TRAF2 (**Fig. 4g**).  
243 Data from immunoprecipitation showed that the Plekho1 mutant with deletion of LZ-containing  
244 domain ( $\Delta$ LZ) could not interact with TRAF2 (**Fig. 4h**, Lane 5), but other Plekho1 mutants could still  
245 bound to TRAF2 (**Fig. 4h**, Lane 2-4).

246 As TRAF2 could ubiquitinate RIP1, which is essential for NF- $\kappa$ B activation[19], we then determined  
247 whether PLEKHO1 affected TRAF2-mediated RIP1 ubiquitination. We performed *in vivo*  
248 ubiquitination assay in HEK293T cells transfected with Myc-RIP1, HA-Ubiquitin (HA-Ub),  
249 Flag-Plekho1 or Flag- $\Delta$ LZ and Flag-TRAF2 or Flag- $\Delta$ TRAF C. Our results demonstrated that  
250 PLEKHO1 promoted the TRAF2-mediated ubiquitination of RIP1 (lane 3 in **Fig. 4i**, lane 3 in **Fig. 4k**,  
251 **Fig. 4j**, **Fig. 4l**). Nevertheless, PLEKHO1 mutant with deletion of c-terminal LZ-containing domain  
252 had no obvious promotive effects on TRAF2-mediated ubiquitination of RIP1 (lane 4 in **Fig. 4i**, **Fig.**  
253 **4j**). Disruption of TRAF2-PLEKHO1 interaction by deletion of  $\Delta$ TRAF C in TRAF2 also diminished the  
254 promotive effect of PLEKHO1 on TRAF2-mediated RIP1 ubiquitination (lane 4 in **Fig. 4k**, **Fig. 4l**). All  
255 these results indicated that PLEKHO1 could interact with TRAF2 to promote the TRAF2-mediated  
256 ubiquitination of RIP1.

257

258 **Osteoblastic PLEKHO1 inhibition alleviates joint inflammation and bone formation reduction**  
259 **in CIA mice**

260 Next, to test whether early inhibition of osteoblastic PLEKHO1 could alleviate joint inflammation  
261 and promote bone formation in mice with established arthritis, we used a cross-species *Plekho1*  
262 siRNA and a nucleic acid delivery system targeting osteoblasts, which were both established by our  
263 group [5, 8]. This cross-species *Plekho1* siRNA could target the four species (human, monkey, rat  
264 and mouse). *In vivo* studies demonstrated that periodic intravenous injections of this cross-species  
265 *Plekho1* siRNA promoted bone formation and reversed bone loss in the osteoporotic mice. On the  
266 other hand, to facilitate delivering this cross-species *Plekho1* siRNA to osteoblasts, we have  
267 developed a targeted delivery system – (AspSerSer)<sub>6</sub>-liposome. We confirmed that this targeted  
268 delivery system could facilitate *Plekho1* siRNA specifically achieve high gene knockdown efficiency in  
269 osteoblasts. Therefore, we then performed six consecutive administration of this cross-species  
270 *Plekho1* siRNA encapsulated by the osteoblast-targeting delivery system  
271 ((AspSerSer)<sub>6</sub>-liposome-*Plekho1* siRNA, hereafter siRNA) in DBA/1 mice at an interval of one week  
272 from day 28 after primary immunization with bovine type II collagen, because arthritis was clinically  
273 evident at this time point (**Supplementary Fig. 7a**). We firstly confirmed that the level of *Plekho1*  
274 mRNA was significantly downregulated in Ocn<sup>+</sup> cells of siRNA-treated CIA mice after six-week  
275 treatment (on day 70 after primary immunization) (**Supplementary Fig. 7b**). Thereafter, we found  
276 that arthritis score was significantly decreased in siRNA-treated CIA mice when compared to mice  
277 treated with (AspSerSer)<sub>6</sub>-liposome-non sense siRNA (hereafter NS), (AspSerSer)<sub>6</sub>-liposome  
278 (hereafter VEH) or PBS (**Fig. 5a**). Histological evaluation showed that the score of joint inflammation  
279 in siRNA-treated CIA mice was also significantly lower when compared to three other control groups

280 after treatment (**Fig. 5b, 5c**). IL-1 $\beta$  and IL-6 levels in ankle joint of hind paws from siRNA-treated CIA  
281 mice were also significantly lower when compared with the three other control groups  
282 (**Supplementary Fig. 7c**). Subsequently, microCT analysis showed better organized  
283 microarchitecture and a higher bone mass in tibial bone of siRNA-treated CIA mice compared to mice  
284 treated with NS, VEH or PBS after treatment (**Fig. 5c**). The values of BMD, BV/TV, Tb.N and Tb.Th of  
285 the tibial bones had remarkable restoration in siRNA-treated CIA mice, whereas such restoration was  
286 not observed in CIA mice treated with NS, VEH or PBS (**Fig. 5d**). Similarly, we found a larger width  
287 between the xlenol and calcein labeling bands in the mice treated with siRNA compared to the mice  
288 treated with NS, VEH or PBS. The values of MAR, BFR/BS and Ob.S/BS were significantly higher,  
289 whereas the value of Oc.S/BS were significantly lower in siRNA group when compared with three  
290 other control groups after treatment (**Fig. 5c, Fig. 5e**).

291

### 292 **Plekho1 siRNA delivered to osteoblasts improves arthritis symptoms and promotes bone** 293 **formation in a collagen-induced non-human primate arthritis model**

294 To facilitate our findings to clinical translation, we carried out *Plekho1* siRNA inhibition experiments  
295 in cynomolgus monkeys (**Supplementary Fig. 8a**). We firstly confirmed that *Plekho1* mRNA  
296 expression in osteoblasts was significantly inhibited till 5 weeks after treatment with siRNA  
297 (**Supplementary Fig. 8b**). Thereafter, we found that the body weight, an important indicator for  
298 disease progression, in NS and PBS-treated monkeys were gradually decreased during 5-week  
299 treatment, whereas the body weight in siRNA-treated monkeys were continuously increased except  
300 one monkey (Monkey 8) (**Fig. 6a**). We also found that arthritis score and the proximal interphalangeal  
301 point (PIP) joint swelling were continuously increased in NS and PBS-treated monkeys, whereas

302 these two parameters in siRNA-treated monkeys maintained at a low level during 5-week treatment  
303 except Monkey 8 (**Fig. 6b, c**). We performed histological evaluation and found that joint inflammation  
304 in siRNA-treated monkeys was significantly attenuated than that of NS and PBS-treated monkeys  
305 after treatment (**Fig. 6d, 6e**). We then used X ray to assess the bony structure of the PIP joints and  
306 found that siRNA treatment could alleviate the continuous increase of the PIP radiological score. After  
307 treatment, the average PIP radiological score in PBS, NS and siRNA-treated monkeys were  $43.33 \pm$   
308  $5.51$ ,  $43.67 \pm 7.09$ ,  $20 \pm 14.42$ , respectively (**Fig. 6f, 6g**). Consistent with the X ray findings, microCT  
309 reconstruction images also showed better organized bony and joint structure in siRNA-treated  
310 monkeys compared to NS and PBS-treated monkeys after treatment (**Fig. 6h**). The values of BMD  
311 and BV/TV were significantly increased in siRNA-treated monkeys after treatment, whereas such  
312 changes were not observed in monkeys treated with NS and PBS (**Fig. 6i**). Furthermore, we found a  
313 larger width between the two labeling bands in the siRNA-treated monkeys compared to NS and  
314 PBS-treated monkeys after treatment (**Fig. 6j**). The values of bone formation parameters MAR and  
315 BFR/BS were also significantly higher in siRNA-treated monkeys compared to NS and PBS-treated  
316 monkeys after treatment (**Fig. 6k**). In addition, we found that siRNA treatment did not cause any  
317 visible differences in appearance, behavior or sign of organ damage when examined by necropsy. To  
318 further evaluate its safety, we performed routine blood, blood coagulation and blood biochemistry  
319 tests, and found no statistically significant differences in these parameters among the three groups  
320 during 5-week treatment (**Supplementary Fig. 8c-e**).

321

322 **Discussion**

323 This study, for the first time, uncovered a new role of osteoblastic PLEKHO1 in regulating joint  
324 inflammation in RA pathogenesis. We further demonstrated that osteoblastic PLEKHO1 inhibition  
325 could not only augment bone formation but also inhibit joint inflammation in RA.

326

327 Previous views suggest that the joint inflammation in RA is mainly mediated by the activated  
328 inflammatory cells such as FLS and immune cells including infiltrated T lymphocytes and  
329 leukocytes[20]. However, it remains unclear whether other cell populations also contribute to regulate  
330 the local joint inflammation. Albeit osteoblasts are among the dominant cell types in the joint, the  
331 current perspectives restrict their role in the modulation of bone formation in RA. Interestingly, our  
332 study showed that osteoblasts could directly contribute to regulate the local joint inflammation during  
333 RA development. The inflammation environment of RA could induce the expression of PLEKHO1  
334 within osteoblasts, as evidenced by the aberrant high levels of PLEKHO1 in osteoblasts of the joint  
335 bone samples from both RA patients and CIA mice as well as the increased PLEKHO1 expression in  
336 both human and mouse osteoblast-like cells stimulated by various inflammatory cytokines. More  
337 surprisingly, we found that genetic deletion of *Plekho1* gene in osteoblasts markedly attenuated the  
338 local joint inflammation in inflammatory arthritic mouse models, as supported by the low arthritis  
339 scores and histological inflammation scores as well as downregulated inflammatory cytokines (IL-1 $\beta$   
340 and IL-6) in joint samples from the *Plekho1*<sub>osx</sub><sup>-/-</sup> mice induced by type II collagen or K/BxN serum.  
341 Moreover, conditional overexpression of osteoblastic *Plekho1* in the *Plekho1* systemic knockout mice  
342 (*Plekho1*<sup>-/-</sup>/*Plekho1*<sub>osx</sub> Tg) significantly exacerbated the joint inflammation in CIA model and STA  
343 model. All these findings indicate that the osteoblasts with high PLEKHO1 expression contribute to



344 the joint inflammation in RA. Despite the regulatory role on BMP signaling, PLEKHO1 has been  
345 identified to regulate the cytokine signaling response to inflammation[10, 11]. A recent study showed  
346 that overexpression of PLEKHO1 triggered the activation of pro-inflammatory pathways in the  
347 HEK293 model system[21]. Consistently, we found lower levels of inflammatory cytokines (IL-1 $\beta$  and  
348 IL-6) in CD4+T cells and FLS as well as decreased migration of neutrophils after co-culture with the  
349 *Plekho1*-depleted osteoblasts derived from the *Plekho1*<sub>osx</sub><sup>-/-</sup> mice when compared to those  
350 co-cultured with *Plekho1*-intact osteoblasts. Furthermore, the above changes in the inflammatory  
351 cells were reversed after co-culture with the *Plekho1*-overexpressed osteoblasts derived from the  
352 *Plekho1*<sub>osx</sub> *Tg* mice. All these results suggest that the elevated osteoblastic PLEKHO1 could regulate  
353 the inflammatory cells that were commonly activated in the local inflammatory environment in RA  
354 joint.

355  
356 TNF- $\alpha$  plays a pivotal role in regulating the inflammatory response in RA through inducing  
357 proinflammatory cytokines release, activating inflammatory cells and promoting leukocytes  
358 accumulation[22]. Recently, emerging evidence indicated that osteoblasts could respond to the  
359 stimulations of TNF- $\alpha$  by secretion of several inflammatory effectors[23, 24]. Our studies showed that  
360 silence of osteoblastic *Plekho1* could remarkably decrease the production of the important  
361 pro-inflammatory cytokines (IL-1 $\beta$  and IL-6). Moreover, we observed remarkable alleviation of local  
362 inflammation in human TNF- $\alpha$  transgenic mice with osteoblastic deficiency of *Plekho1*, implying that  
363 osteoblastic PLEKHO1 on joint inflammation regulation might be related with TNF- $\alpha$  involved signal  
364 mechanism. Therefore, to further investigate the molecular mechanism of osteoblastic PLEKHO1  
365 modulating the joint inflammation in RA, we performed a series of *in vitro* studies. We found that the

366 phosphorylation of IKK $\alpha/\beta$  and p65 as well as the ubiquitination of RIP1 in NF- $\kappa$ B signal pathway were  
367 remarkably inhibited in TNF- $\alpha$ -stimulated osteoblasts after PLEKHO1 silence. Moreover, we  
368 confirmed that PLEKHO1 could bind to TRAF2 and promote TRAF2-mediated RIP1 ubiquitination in  
369 TNF- $\alpha$ -stimulated osteoblasts, and the domains for the interaction were LZ-containing domain of  
370 PLEKHO1 and C domain of TRAF2 respectively. In contrast to the previous studies which  
371 demonstrated that lipid mediator sphingosine-1-phosphate specifically bound to TRAF2 and  
372 increased TRAF2-catalyzed ubiquitination of RIP1[25], our study found a new cofactor “PLEKHO1”  
373 required for TRAF2-mediated RIP1 ubiquitination to activate NF- $\kappa$ B for inducing inflammatory  
374 cytokines production (**Supplementary Fig. 9**).

375

376 In addition, we observed that the osteoblast-specific *Plekho1*-depleted CIA mice showed an  
377 apparent attenuation in bone formation reduction and osteoblast-targeted *Plekho1* siRNA treatment  
378 could promote bone repair in CIA rodents, which could be explained by the above documented role of  
379 PLEKHO1 as a critical ubiquitylation modulator for regulating the BMP signaling[7]. Certainly,  
380 PLEKHO1's effect on local inflammation regulation might also be considered as one of the  
381 mechanisms for its bone formation modulation, as the common view regarded that inflammation  
382 could impair the function of osteoblasts-mediated bone formation in RA[26].

383

384 Considering the role of osteoblastic PLEKHO1 in regulating joint inflammation and bone erosion  
385 repair during RA, inhibition of it may exert dual beneficial effect on RA treatment. Thus, to facilitate its  
386 clinical translation, we evaluated the effect of osteoblast-targeted PLEKHO1 inhibition by  
387 administrating *Plekho1* siRNA encapsulated by our developed osteoblast-targeting delivery system in

388 a CIA mouse model and a non-human primate arthritis model. We demonstrated that  
389 osteoblast-targeting *Plekho1* siRNA treatment not only improved arthritis symptoms and but also  
390 promoted bone formation in both animal models. Moreover, the siRNA treatment didn't cause any  
391 significant side effects. These results will also facilitate clinical translation of RNA interference-based  
392 therapeutic strategy in RA, since currently reports about siRNA-based therapeutic approaches for  
393 rheumatic diseases are almost from rodent experiments[27].

394

395 In summary, our studies uncovered a previously unrecognized role of osteoblastic PLEKHO1 in  
396 mediating the joint inflammation during RA development. Targeting osteoblastic PLEKHO1 may be a  
397 promising therapeutic strategy with dual action of inflammation inhibition and bone formation  
398 augmentation for RA.

399

## 400 **Methods**

### 401 **Human joint bone tissue preparation**

402 Tibial plateau samples from knee joint of subjects with RA (fulfilled the 1987 revised American  
403 College of Rheumatology criteria) were obtained at knee joint replacement surgery and provided by  
404 Shanghai Guanghua Hospital (China). Subjects with malignancy, diabetes or other severe diseases in  
405 the previous 5 years were excluded from our study. For non-RA control, we selected age- and  
406 gender-matched subjects who diagnosed as severe trauma (TM) and underwent knee joint  
407 replacement surgery in Shanghai Guanghua Hospital and Shenzhen 8th People Hospital (China). Half  
408 of the bone samples were fixed with 4% buffered formalin before decalcification, the other half were  
409 stored in liquid nitrogen until use. All the clinical procedures were approved by the Committees of  
410 Clinical Ethics in the Shanghai Guanghua Hospital and Shenzhen 8th People Hospital. All subjects  
411 gave informed consent prior to surgery.

412

### 413 **Cells**

414 Murine osteoblastic cell line, MC3T3E1, was purchased from the Cell Resource Center, Peking  
415 Union Medical College (China) and cultured in  $\alpha$ -MEM (Thermo Fisher Scientific) containing 10% fetal  
416 bovine serum (FBS, Thermo Fisher Scientific) at 37°C in a humidified 5% CO<sub>2</sub> incubator. Human  
417 osteoblast-like cell line, MG-63, was purchased from ATCC and cultured in EMEM (Thermo Fisher  
418 Scientific) containing 10% FBS at 37°C in a humidified 5% CO<sub>2</sub> incubator. Human embryonic kidney  
419 HEK293T cell was purchased from ATCC and cultured in DMEM (Thermo Fisher Scientific)  
420 containing 10% FBS at 37°C in a humidified 5% CO<sub>2</sub> incubator. Primary osteoblast precursor cells  
421 were isolated from the calvarial bone of newborn C57BL/6 mice (1- to 2-day-old) through enzymatic  
422 digestion with  $\alpha$ -MEM containing 0.1% collagenase (Life technologies, Grand Island, NY, USA) and

423 0.2% dispase II (Life Technologies, Grand Island, NY, USA). The isolated osteoblast precursor cells  
424 were promoted with osteogenic  $\alpha$ -MEM medium with 10% FBS, 1% penicillin-streptomycin, 5mM  
425  $\beta$ -glycerol phosphate (Sigma-Aldrich, St. Louis, MO, USA), 0.1mg/ml ascorbic acid (Sigma-Aldrich, St.  
426 Louis, MO, USA) and 10nM dexamethasone (Sigma-Aldrich, St. Louis, MO, USA) for 9 days and  
427 culture medium was replaced every 2–3 days[28]. Primary fibroblast-like synoviocytes (FLS) were  
428 isolated from the ankle joints of C57BL/6 mice by collagenase digestion[29]. Isolated FLS were grown  
429 in DMEM high glucose, GlutaMAX (Life Technologies, Grand Island, NY, USA) supplemented with 10%  
430 FBS and 1% penicillin-streptomycin. As no bone marrow-derived lineage cells were detected after  
431 passage 3, cultured FLS were used between passages 4-8. CD4<sup>+</sup>T lymphocytes were isolated from  
432 the spleen single-cell suspension of C57BL/6 mice by specific magnetic beads-based  
433 negative-selection (Miltenyi Biotec, Bergisch Gladbach, Germany). Neutrophils were isolated from  
434 peripheral blood of C57BL/6 mice by specific magnetic beads sorting (Miltenyi Biotec, Bergisch  
435 Gladbach, Germany)[30]. Before use, osteoblasts were confirmed to express osteocalcin, synovial  
436 fibroblasts were confirmed to express vascular cell adhesion molecule 1 and not F4/80 or CD45,  
437 CD4<sup>+</sup>T lymphocytes were confirmed to express CD3 and CD4, and neutrophils were confirmed to  
438 express Gr-1 and CD11b.

439

#### 440 **Co-culture and migration experiment**

441 For osteoblasts-FLS co-culture: FLS were grown in co-culture with osteoblasts from *Plekho1*<sup>osx<sup>-/-</sup></sup>  
442 mice, *Plekho1*<sup>osx</sup> *Tg* mice or WT littermates. Co-culture experiments were conducted in 6-well  
443 transwell coculture plates (Millipore, Billerica, MA, USA). The primary osteoblasts ( $5 \times 10^5$ /well) were  
444 placed in the lower well and FLS ( $5 \times 10^5$ /well) in the inserts. TNF- $\alpha$  was added for 24 h. After

445 experiment, FLS were collected and the mRNA levels of IL-1 $\beta$  and IL-6 were detected by quantitative  
446 real-time PCR. For osteoblasts-CD4+T cells co-culture: Isolated CD4+T lymphocytes were grown in  
447 co-culture with osteoblasts from *Plekho1*<sub>osx</sub><sup>-/-</sup> mice, *Plekho1*<sub>osx</sub> *Tg* mice or WT littermates. Coculture  
448 experiments were conducted in 6-well transwell coculture plates (Millipore, Billerica, MA, USA). The  
449 primary osteoblasts (5 $\times$ 10<sup>5</sup>/well) were placed in the lower well and CD4+T lymphocytes (1 $\times$ 10<sup>6</sup>/well)  
450 in the inserts. TNF- $\alpha$  was added for 24 h. After experiment, FLS were collected and the mRNA levels  
451 of IL-1 $\beta$  and IL-6 were detected by quantitative real-time PCR. For osteoblasts-neutrophils co-culture:  
452 Isolated neutrophils were plated onto 3.0 $\mu$ m pore polycarbonate membrane transwell inserts, which  
453 were placed into the osteoblasts culture wells in the presence of TNF- $\alpha$ . Neutrophils were allowed to  
454 migrate through the membrane for 2 h. Migrated cells attached to the bottom of the well were stained  
455 by chloroacetate esterase and positive cells were counted to determine changes in chemotactic  
456 activity of osteoblasts.

457

#### 458 **siRNA inhibition**

459 *Plekho1* siRNA and non-sense siRNA (random siRNA) were purchased from GenePharma (Shanghai,  
460 China). Transfection was performed with Lipofectamine™ 2000 (Invitrogen Life Technologies,  
461 Carlsbad, CA, USA) according to the manufacturer's instructions. Briefly, murine osteoblastic cell line  
462 MC3T3E1 were seeded in a 6-well plate. Then, 4  $\mu$ l of 20  $\mu$ M *Plekho1* siRNA and 2.5  $\mu$ l of  
463 Lipofectamine™ 2000 were diluted in 0.25 ml of Opti-MEM separately for each well. After 5 min of  
464 incubation at room temperature, the diluted *Plekho1* siRNA and Lipofectamine™ 2000 were mixed  
465 gently and allowed to stand for 20 min at room temperature. Then, cells were washed by PBS. And  
466 1.5 ml MEM without serum and antibiotics was added to each well. Followed by adding 0.5 ml of

467 Opti-MEM containing the Lipofectamine™ 2000-siRNA complex and incubated for 6 h at 37 °C.  
468 Non-sense siRNA transfected by Lipofectamine™ 2000 were used as negative control. Then, the  
469 Lipofectamine™ 2000-siRNA complex was removed and replaced with fresh complete MEM. Next,  
470 the cells were stimulated by 10 ng/ml TNF- $\alpha$  for another 45 min. The supernatant and the cell lysis  
471 were collected for ELISA and western blot analysis, respectively.

472

### 473 **Plasmid construction and transfection**

474 HEK293T cells were cultured and used for transfection. Plasmids of different epitope-tagged  
475 human Plekho1 and TRAF2, including both full-length proteins and truncated mutants, as well as  
476 human RIP1 were constructed by PCR, followed by subcloning into expression vector pcDNA3.1[17,  
477 18, 31, 32]. Plasmid of HA-tagged human ubiquitin-K63 was from Addgene. Transfection was  
478 performed using Lipofectamine 2000 (Invitrogen) according to the manufacturer's instructions [7].

479

### 480 **Immunoprecipitation and immunoblotting**

481 At 36 h after the transfection, HEK293T were lysed in HEPES lysis buffer (20 mM HEPES pH 7.2,  
482 50 mM NaCl, 0.5% Triton X-100, 1 mM NaF, 1 mM dithiothreitol) supplemented with protease inhibitor  
483 cocktail (Roche) and phosphatase inhibitors (10mM NaF and 1mM Na<sub>3</sub>VO<sub>4</sub>). Immunoprecipitations  
484 were performed using anti-Flag or anti-Myc antibody and protein A/G-agarose (Santa Cruz  
485 Biotechnology) at 4 °C. Plekho1 and TRAF2, including full-length proteins and truncated mutants, in  
486 lysates or immunoprecipitates were examined by anti-Myc (Cell Signaling Technology) and anti-Flag  
487 (Sigma) primary antibodies, respectively, and the appropriate secondary antibodies in immunoblotting,  
488 followed by detection with SuperSignal chemiluminescence kit (Thermo Fisher Scientific)[6, 7, 33].

489

### 490 ***In vivo* ubiquitylation assay**

491 HEK293T cells were transfected with Myc-RIP1, HA-Ub-K63, Flag-Plekho1 or Flag- $\Delta$ LZ and  
492 Flag-TRAF2 or Flag- $\Delta$ TRAF C. At 36 h after the transfection, cells were lysed in HEPES lysis buffer  
493 and then incubated with anti-Myc antibody (Sigma) for 3 h and protein A/G-agarose beads (Santa  
494 Cruz Biotechnology) for a further 8 h at 4 °C. After three washes, ubiquitination of RIP1 was detected  
495 by immunoblotting with an anti-HA antibody (Cell Signaling Technology)[7, 25].

496

### 497 **Animals**

498 Osteoblast-specific *Plekho1* knockout mice (*Plekho1*<sub>osx</sub><sup>-/-</sup> mice), *Plekho1* knockout mice (*Plekho1*<sup>-/-</sup>  
499 mice) and osteoblast-specific *Plekho1* overexpressing (*Plekho1*<sub>osx</sub> *Tg*) mice were prepared according  
500 to our previous reports[34]. We generated the *Plekho1*<sub>osx</sub><sup>-/-</sup> mice based on the Cre-loxP strategy.  
501 Briefly, we created the heterozygous mice carrying the mutant allele with LoxP sites harboring exon 3  
502 to exon 6 of *Plekho1* gene (*Plekho1*<sup>fl/+</sup>), which were then crossed with *Osx*-Cre mice (Beijing  
503 Biocytogen Co., Ltd, China) to generate the *Plekho1*<sub>osx</sub><sup>-/-</sup> mice. To generate *Plekho1*<sup>-/-</sup> mice, *Plekho1*<sup>fl/+</sup>  
504 mice were crossed with CMV-Cre mice (Beijing Biocytogen Co., Ltd, China). To generate *Plekho1*<sub>osx</sub>  
505 *Tg* mice, we created a mouse strain carrying the ROSA26-PCAG-STOP<sup>fl</sup>-*Plekho1*-eGFP allele, and  
506 crossed them with the *Osx*-Cre mice to generate the *Plekho1*<sub>osx</sub> *Tg* mice that overexpressing *Plekho1*  
507 in osteoblasts. DBA/1 mice and C57BL/6J mice were from Vital River Laboratory Animal Technology  
508 Co., Ltd. (Beijing, China). The human TNF transgenic (hTNFtg) mice (strain Tg197; genetic  
509 background, C57BL/6) were obtained from Dr. G. Kollias (Institute of Immunology, Biomedical  
510 Sciences Research Center “Alexander Fleming,” Vari, Greece). KRN T cell receptor (TCR) transgenic



511 mice (B10.BR genetic background) were obtained from Dr. D. Mathis and Dr. C. Benoist (Harvard  
512 Medical School, Boston, Massachusetts, USA) and maintained on a C57BL/6 background. NOD/Lt  
513 mice were purchased from HFK Bioscience Co.,Ltd (Beijing, China) and were used for breeding of  
514 K/BxN arthritic mice. Male *Plekho1<sub>osx</sub><sup>-/-</sup>* mice were bred with female hTNFtg mice to obtain  
515 *Plekho1<sub>osx</sub><sup>-/-</sup>/hTNFtg* mice. Male *Plekho1<sup>-/-</sup>* mice were bred with female *Plekho1<sub>osx</sub> Tg* mice to  
516 generate offspring (*Plekho1<sup>-/-</sup>/Plekho1<sub>osx</sub> Tg* mice) that express high PLEKHO1 exclusively in  
517 osteoblasts. All mice data were generated from age- and sex-matched littermates. Female  
518 cynomolgus monkeys (*Macaca fascicularis*), 3-4 years old, were purchased from PharmaLegacy  
519 Laboratories Co., Ltd (Shanghai, China). All the animals were maintained under standard animal  
520 housing conditions (12-h light, 12-h dark cycles and free access to food and water). All procedures were  
521 approved by the Ethical Animal Care and Use Committee in China Academy of Chinese Medical  
522 Sciences and Hong Kong Baptist University.

523

#### 524 **Collagen-induced arthritis (CIA) mice model**

525 The induction of CIA was performed as previously described with slight modification[35]. Briefly,  
526 type II collagen (bovine type II collagen for DBA/1 mice, chicken type II collagen for C57BL/6J mice)  
527 (Sigma-Aldrich, St. Louis, MO, USA) was dissolved at a concentration of 2 mg/ml in 0.05 M acetic  
528 acid and emulsified with complete Freund's adjuvant (CFA) (Sigma-Aldrich, St. Louis, MO, USA). To  
529 induce CIA in C57BL/6J mice, 100mg of desiccated killed *Mycobacterium tuberculosis* H37Ra (BD  
530 Biosciences) was suspended in 30ML of CFA[36]. On day 0, the CIA mice were immunized with 0.1  
531 mL of collagen by intradermal injection at the base of the tail. On day 21, mice were given a booster  
532 dose of collagen through the same route.

533

534 **K/BxN serum-transfer arthritis (STA) mice model**

535 Pro-arthritic serum was isolated from K/BxN mice (generated by crossing KRN TCR transgenic  
536 mice with NOD/Lt mice) as previously described[37]. K/BxN arthritis was induced by the  
537 intraperitoneal injection of diluted K/BxN serum (75  $\mu$ l serum with 75  $\mu$ l endotoxin-free PBS) in  
538 C57BL/6J mice on day 0 and 2[38].

539

540 **Collagen-induced arthritis (CIA) non-human primate model**

541 The induction of CIA in cynomolgus monkeys was performed as previously described with slight  
542 modification[39]. Briefly, bovine type II collagen (4 mg/mL) was emulsified in an equal volume of  
543 complete Freund's adjuvant. Ten monkeys were immunized with 1 mL of the cold emulsion by  
544 intradermal injections divided over 20 sites: 19 sites on the back and 1 site at the base of the tail, and  
545 after a three-week interval, boosted with the same immunizing procedure. During the study, body  
546 weight was recorded once a week. Onset of CIA was monitored by arthritic score, once a monkey  
547 fulfilled the criteria of 5% of the maximum arthritic score, it was assigned to the respective treatment  
548 group.

549

550 **Treatment**

551 For mice siRNA treatment experiment: DBA/1 mice were induced by type II collagen. After CIA was  
552 successfully established (day 28 after primary immunization, a mouse with a score of one or above  
553 was regarded as arthritic), parts of the mice were sacrificed before treatment as CIA baseline  
554 (CIA-BL). The remaining CIA mice were divided into (AspSerSer)<sub>6</sub>-liposome-*Plekho1* siRNA group,

555 (AspSerSer)<sub>6</sub>-liposome-non sense siRNA group, (AspSerSer)<sub>6</sub>-liposome group, and vehicle control  
556 group. The mice in each group received six periodic intravenous injections of  
557 (AspSerSer)<sub>6</sub>-liposome-*Plekho1* siRNA, (AspSerSer)<sub>6</sub>-liposome-non sense siRNA,  
558 (AspSerSer)<sub>6</sub>-liposome, and PBS, respectively, with a siRNA dose of 5.89 mg/kg at an interval of one  
559 week.

560 For non-human primate siRNA treatment experiment: After CIA was successfully established, one  
561 monkey was sacrificed before siRNA treatment as CIA baseline (CIA-BL). The remaining CIA  
562 monkeys were divided into three groups: (AspSerSer)<sub>6</sub>-liposome-*Plekho1* siRNA group,  
563 (AspSerSer)<sub>6</sub>-liposome-non sense siRNA group, and vehicle control group. The monkeys in each  
564 group received five periodic intravenous injections of (AspSerSer)<sub>6</sub>-liposome-*Plekho1* siRNA,  
565 (AspSerSer)<sub>6</sub>-liposome-non sense siRNA and PBS, respectively, with a siRNA dose of 1mg/kg at an  
566 interval of one week.

567

#### 568 **Evaluation of arthritis severity**

569 Clinical severity of arthritis in mice was evaluated according to the following visual scoring  
570 system[35]: 0 = no swelling or erythema; 1 =Erythema and mild swelling confined to the tarsals or  
571 ankle joint; 2 = Erythema and mild swelling extending from the ankle to the tarsals; 3 = Erythema and  
572 moderate swelling extending from the ankle to metatarsal joints; 4 = Erythema and severe swelling  
573 encompass the ankle, foot and digits, or ankylosis of the limb. Each limb was assigned a score of 0 to  
574 4, with a maximum possible score of 16 for each mouse.

575 The severity of arthritis in monkeys was assessed by observing the degree of swelling and rigidity  
576 at the metacarpophalangeal (MCP), proximal interphalangeal (PIP), and distal interphalangeal (DIP)

577 joints of both the hands and feet, as well as the wrists, ankle, elbow, and knee (total 64 joints) weekly  
578 until the end of experiment, as reported in previous literature with slight modifications[40]. Each joint  
579 was assessed in accordance with the evaluation criteria shown as follows: 0 = normal; 1 = swelling  
580 not visible but can be determined by touch; 2 = swelling slightly visible and can be confirmed by touch;  
581 3 = swelling clearly visible and/or noticeable joint deformity. Each joint is examined as per the  
582 evaluation criteria. The arthritis score for each animal was designated as the sum of individual joint  
583 score, with maximum score of 192.

584

### 585 **Evaluation of joint swelling**

586 Joint swelling at PIP joints of each cynomolgus monkey was measured by vernier caliper (Mitutoyo,  
587 Neuss, Germany) every week and calculated using the following formula: PIP swelling(mm<sup>2</sup>)=  
588 horizontal diameter x vertical diameter x 3.14 x 0.25.

589

### 590 **Radiographic Examination**

591 Radiographs of the animals were obtained using a Portable X-ray SP-VET-4.0 unit (Sedecal,  
592 Madrid, Spain). In anesthetized condition, the hands and feet of the monkeys were radiographed in  
593 the dorso-palmar position. Radiology projections of arthritic hands and feet were performed weekly to  
594 assess the extent of joint destruction, bone erosion and joint space narrowing. The digital radiographs  
595 images of the hands and feet were acquired and the PIP joints were graded according to the modified  
596 Larsen's method with minor modifications[41]. The scoring criteria were as follows: 1 = Minor  
597 deformity in joint cartilage layers, and / or subchondral bone regions; 2 = Severe deformity in joint  
598 cartilage layers and subchondral bone regions, small amount of osteophytes present. The joint cavity

599 fuzzy, but visible; 3 = Severe Grade 2 changes + Large amount of osteophytes present. The joint  
600 cavity was indistinguishable or invisible; 4= Severe Grade 3 changes + the joint cavity undetectable.  
601 Bones appeared sclerotic or ankylosing with major joint disfiguration. The scoring was done by two  
602 blinded professional investigators respectively. The radiologic score of PIP joints (4 x4) for each  
603 animal ranged from 0 to 64.

604

### 605 **Routine blood tests and blood biochemistry**

606 During the course of non-human primate studies, blood samples (2 mL) were collected in EDTA  
607 treated tubes at various time points and processed appropriately to run assessments for hematology,  
608 coagulation, serum chemistry. Hematology and coagulation measurements were made on whole  
609 blood and analyzed with automated hematology analyzer (Sysmex XT-2000iV™, UK) and Amax  
610 Destiny Plus™ analyzer (Trinity Biotech), respectively. Serum chemistry was determined with  
611 biochemical analyzer Hitachi-7180 (Hitachi, Tokyo, Japan).

612

### 613 **ELISA**

614 Ankle joints of mice were pulverized using a mortar and pestle filled with liquid nitrogen. Tissue  
615 was transferred to 15 ml tubes, placed on dry ice and resuspended in 1 ml PBS/200 mg of tissue and  
616 homogenized using a tissue homogeniser. Joint homogenates were centrifuged for 10 min at 500g at  
617 4°C. Supernatants were transferred to 1.5 ml tubes, centrifuged at 15,000 g for 5 min and collected  
618 for analysis. IL-1 $\beta$  and IL-6 quantifications were determined by ELISA according the instructions of  
619 the manufacturer (eBioscience), data was multiplied by a dilution factor for conversion from pg/ml to  
620 pg/g [42].

621

## 622 **Total RNA isolation, reverse transcription and quantitative real-time PCR**

623 Total RNA was isolated from cultured cells and isolated cells using the RNeasy® Mini Kit (QIAGEN,  
624 Dusseldorf, Germany). The concentration of total RNA was determined using a spectrophotometer.  
625 cDNA was synthesized from 0.5 µg of total RNA using a commercial first-strand cDNA synthesis kit  
626 (QIAGEN, Dusseldorf, Germany). Real-time PCR reactions were performed using SYBR Green in a  
627 7900HT Fast Real-Time PCR System (Applied Biosystems, Foster City, California, USA). The  
628 employed primer sequences in the study were listed in **Supplementary Table 1**. The amplification  
629 conditions were as follows: 50°C for 2 minutes, 95°C for 10 minutes, 40 cycles of 95°C for 15 seconds,  
630 and 60°C for 1 minute. The fluorescence signal emitted was collected by ABI PRISM® 7900HT  
631 Sequence Detection System and the signal was converted into numerical values by SDS 2.1 software  
632 (Applied Biosystems). The mRNA expression level of the target gene was first calculated from the  
633 Relative Standard Curve Method by the SDS 2.1 software. The threshold cycle (Ct) value, which  
634 represents the relative expression of each target gene, was determined from the corresponding curve.  
635 Then, the relative expression of mRNA was determined by dividing the target amount by endogenous  
636 control amount to obtain a normalized target value. The relative mRNA expression was calculated using  
637 the  $2^{-\Delta\Delta Ct}$  method as follow:  $\Delta\Delta Ct = (Ct_{\text{target gene}} - Ct_{\text{reference gene}})_{\text{experimental group}} - (Ct_{\text{target gene}} - Ct_{\text{reference gene}})_{\text{WT-OB group}}$ [8].  
638

639

## 640 **Western blot analysis**

641 The bone specimens and cells were snap-frozen in liquid nitrogen and mechanically homogenized in  
642 lysis buffer. Protein fractions were collected by centrifugation at 15,000g at 4 °C for 10 min and then

643 subjected to SDS-PAGE and transferred to polyvinylidene difluoride (PVDF) membranes. The  
644 membranes were blocked with 5% BSA and incubated with specific antibodies overnight. A horseradish  
645 peroxidase-labeled secondary antibody (Abcam) was added and visualized using an enhanced  
646 chemiluminescence kit (Pierce). Antibodies to the following proteins were used: GAPDH (Sigma),  
647 PLEKHO1 (Santa Cruz, sc-50227), IKK $\beta$  (Cell Signaling Technology, #8943), p-IKK $\alpha/\beta$  (Cell Signaling  
648 Technology, #2078), p65 (Cell Signaling Technology) and p-p65 (Abcam, ab106129). The relative  
649 amounts of the transferred proteins were quantified by scanning the auto-radiographic films with a gel  
650 densitometer (Bio-Rad, USA) and normalized to the corresponding GAPDH level[43].

651

#### 652 **Laser capture micro-dissection (LCM)**

653 For LCM, the hind paw of mice and the hand of monkeys were decalcified in 10%  
654 ethylenediaminetetraacetic acid (EDTA) and embedded in OCT. Then, the series frozen sections (5 $\mu$ m)  
655 were prepared in a cryostat (CM3050; Leica Microsystems, Wetzlar, Germany) at -20°C. Adjacent  
656 sections were mounted on either glass slides or polyethylene membrane-equipped slides (P.A.L.M.,  
657 Bernried, Germany). The sections mounted on glass slides were performed immunostaining to identify  
658 the osteocalcin-positive cells. Briefly, the cryosections were air dried at room temperature, fixed in  
659 ice-cold acetone for 10 min, permeabilized in 0.1% Triton X-100 at room temperature for 20 min, and  
660 blocked in 5% donkey serum in PBS. The sections were incubated overnight at 4 °C with rabbit  
661 polyclonal anti-osteocalcin antibody (1:50 dilution; Santa Cruz Biotechnology, Inc.). After three washes  
662 in PBS, the sections were incubated with Alexa Fluor 488-conjugated donkey anti-rabbit IgG (1:400  
663 dilution; Invitrogen). Finally, the sections were mounted with medium containing  
664 (4',6-diamidino-2-phenolindole) DAPI (Vector laboratories) and examined under a fluorescence

665 microscope to identify the osteocalcin-positive staining cells. The adjacent sections mounted on  
666 membrane-coated slides were stained with neutral red for 1 min at room temperature. After brief rinsing  
667 in water, the sections were air-dried. Osteocalcin-positive staining cells in adjacent sections were  
668 isolated by microdissection with an upgraded laser pressure catapulting microdissection system  
669 (P.A.L.M.) using a pulsed 355 nm diode laser in the Leica LMD 7000 Laser Microdissection System.  
670 About 100~200 identified cells were collected in reaction tube containing 5 $\mu$ l lysis buffer for RNA  
671 extraction and subsequent real-time PCR analysis following above mentioned protocols[43].

672

### 673 **Immunofluorescence staining**

674 The bone specimens were fixed with 4% buffered formalin and embedded with O.C.T. after  
675 decalcification with 10% EDTA. The frozen sections (5  $\mu$ m thickness) were cut in a freezing cryostat at  
676 -20°C. The sections were air dried at room temperature, fixed in ice-cold acetone for 10 min,  
677 permeabilized with 0.1% Triton X-100 at room temperature for 20 min, and blocked in 5% donkey  
678 serum in PBS. The sections were then incubated overnight at 4°C with the mixture of goat polyclonal  
679 osteocalcin antibody (1:50; Santa Cruz Biotechnology, Inc.), and rabbit polyclonal PLEKHO1 antibody  
680 (1:50; Santa Cruz Biotechnology, Inc.). Following three washes in PBS, the sections were incubated  
681 with the mixture of Alexa Fluor 488-conjugated donkey anti-goat antibody, and Alexa Fluor  
682 568-conjugated donkey anti-rabbit antibody (1:300; Invitrogen) for 1 h. Negative control experiments  
683 were done by omitting the primary antibodies. The sections were mounted with the medium containing  
684 DAPI (Vector Laboratories) and then examined under a fluorescence microscope (DM6000B, Leica  
685 image analysis system)[43, 44] .

686



## 687 **MicroCT analysis**

688 MicroCT analyses were performed using a high-speed  $\mu$ CT (viva CT 40, Scanco Medical,  
689 Switzerland) at energy of 70 kVp and intensity of 114  $\mu$ A with high resolution and voxel size of 15  $\mu$ m  
690 of 10.5  $\mu$ m (mouse), 19 $\mu$ m (monkey). In mouse studies, the hind limbs were scanned and the  
691 proximal tibia was selected for analysis. In non-human primate study, the fore- hand was scanned  
692 and the PIP joint was selected for analysis. 3D reconstruction analysis was performed with SCANCO  
693 software (SCANCO Medical, Switzerland). Standard image analysis procedures were used to  
694 determine trabecular and cortical parameters. The following parameters were determined: bone  
695 mineral density (BMD), trabecular fraction (BV/TV), trabecular number (Tb.N) and trabecular  
696 thickness (Tb.Th)[45].

697

## 698 **Histology evaluation**

699 The hind paw of mice and the hand of monkeys were fixed in 4% formaldehyde, decalcified with  
700 EDTA and embedded in paraffin. The serial sections of the paw and hand were examined for  
701 inflammation using hematoxylin and eosin staining. Inflammation was scored according to the  
702 following criteria: 0 = normal; 1 = minimal infiltration of inflammatory cells in perijoint area; 2 = mild  
703 infiltration; 3 = moderate infiltration; and 4 = marked infiltration[46]. Scoring was executed blindly by  
704 two investigators and mean values were calculated.

705

## 706 **Bone histomorphometric analysis**

707 To assess bone formation, the animals were administered with xylenol orange (90 mg/kg) and  
708 calcein green (10 mg/kg) for labeling bone formation surface on day 12 and day 2 before sacrifice by

709 intraperitoneal injection, respectively. The hind paw of mice and the hand of monkeys were fixed in 70%  
710 ethanol. The samples were trimmed from surrounding soft tissues, dehydrated in a series of ethanol  
711 solutions (70%, 80%, 90%, 95% and 100%), and embedded in methyl methacrylate. Non-decalcified  
712 histological sections (10 $\mu$ m thick) were made using a diamond saw microtome. The sections for light  
713 microscopic observations were performed by the modified Goldner's trichrome, while unstained  
714 sections were prepared for fluorescent microscope observations. In mice study, the calcaneus area  
715 within the hind paw was chosen for histomorphometric analysis. In non-human primate study, the PIP  
716 joint was selected for analysis. All the measurements were performed using the professional image  
717 software (ImageJ, NIH, USA and BIOQUANT OSTEO, Version 13.2.6, Nashville, TN, USA). The  
718 following bone histomorphometric parameters for bone remodeling activity were analyzed, including  
719 mineral apposition rate (MAR), bone formation rate/bone surface (BFR/BS), osteoblast surface  
720 (Ob.S/BS), osteoblast number (Ob.N/B.Pm), osteoclast surface (Oc.S/BS) and osteoclast number  
721 (Oc.N/B.Pm)[8].

722

### 723 **Statistical analysis**

724 For statistical analysis, data were expressed as the mean  $\pm$  standard deviation. In general,  
725 statistical differences among groups were analyzed by one-way analysis of variance (ANOVA) with a  
726 Tukey's multiple comparisons test to determine group differences in the study parameters. Especially,  
727 the dynamic detection data were compared by means of two-way ANOVA with subsequent Bonferroni  
728 posttests. All statistical analyses were performed using Graphpad Prism Software, 6.05 (Graph Pad  
729 Software Inc., San Diego, CA). P values less than 0.05 are considered significant.

730

731 **References**

- 732 1. Walsh, N.C., et al., *Rheumatic diseases: the effects of inflammation on bone*.  
733 *Immunol Rev*, 2005. **208**: p. 228-51.
- 734 2. Muller-Ladner, U., et al., *Mechanisms of disease: the molecular and cellular basis*  
735 *of joint destruction in rheumatoid arthritis*. *Nat Clin Pract Rheumatol*, 2005. **1**(2): p.  
736 102-10.
- 737 3. Chauhan, V.S. and I. Marriott, *Differential roles for NOD2 in osteoblast*  
738 *inflammatory immune responses to bacterial pathogens of bone tissue*. *Journal of*  
739 *Medical Microbiology*, 2010. **59**(7): p. 755-762.
- 740 4. Dapunt, U., et al., *The osteoblast as an inflammatory cell: production of cytokines*  
741 *in response to bacteria and components of bacterial biofilms*. *Bmc*  
742 *Musculoskeletal Disorders*, 2016. **17**.
- 743 5. Guo, B., et al., *Therapeutic RNA interference targeting CKIP-1 with a*  
744 *cross-species sequence to stimulate bone formation*. *Bone*, 2014. **59**: p. 76-88.
- 745 6. Zhang, L., et al., *CKIP-1 regulates macrophage proliferation by inhibiting*  
746 *TRAF6-mediated Akt activation*. *Cell Res*, 2014. **24**(6): p. 742-61.
- 747 7. Lu, K., et al., *Targeting WW domains linker of HECT-type ubiquitin ligase Smurf1*  
748 *for activation by CKIP-1*. *Nat Cell Biol*, 2008. **10**(8): p. 994-1002.
- 749 8. Zhang, G., et al., *A delivery system targeting bone formation surfaces to facilitate*  
750 *RNAi-based anabolic therapy*. *Nat Med*, 2012. **18**(2): p. 307-14.
- 751 9. Liu, J., et al., *Increased PLEKHO1 within osteoblasts suppresses*  
752 *Smad-dependent BMP signaling to inhibit bone formation during aging*. *Aging Cell*,

- 753 2017. **16**(2): p. 360-376.
- 754 10. Zhang, L.Q., et al., *The PH domain containing protein CKIP-1 binds to IFP35 and*  
755 *Nmi and is involved in cytokine signaling*. Cellular Signalling, 2007. **19**(5): p.  
756 932-944.
- 757 11. Sakamoto, T., et al., *CKIP-1 is an intrinsic negative regulator of T-cell activation*  
758 *through an interaction with CARMA1*. PLoS One, 2014. **9**(1): p. e85762.
- 759 12. Choy, E., *Understanding the dynamics: pathways involved in the pathogenesis of*  
760 *rheumatoid arthritis*. Rheumatology (Oxford), 2012. **51 Suppl 5**: p. v3-11.
- 761 13. Hayden, M.S. and S. Ghosh, *Shared principles in NF-kappaB signaling*. Cell, 2008.  
762 **132**(3): p. 344-62.
- 763 14. Tsai, C.L., et al., *TNF-alpha induces matrix metalloproteinase-9-dependent*  
764 *soluble intercellular adhesion molecule-1 release via TRAF2-mediated MAPKs*  
765 *and NF-kappaB activation in osteoblast-like MC3T3-E1 cells*. J Biomed Sci, 2014.  
766 **21**: p. 12.
- 767 15. Aggarwal, B.B., *Signalling pathways of the TNF superfamily: a double-edged*  
768 *sword*. Nat Rev Immunol, 2003. **3**(9): p. 745-56.
- 769 16. Zheng, C., Q. Yin, and H. Wu, *Structural studies of NF-kappaB signaling*. Cell Res,  
770 2011. **21**(1): p. 183-95.
- 771 17. Hoeflich, K.P., et al., *Mediation of TNF receptor-associated factor effector*  
772 *functions by apoptosis signal-regulating kinase-1 (ASK1)*. Oncogene, 1999.  
773 **18**(42): p. 5814-20.
- 774 18. Wang, Y., et al., *CKIP-1 couples Smurf1 ubiquitin ligase with Rpt6 subunit of*

- 775 *proteasome to promote substrate degradation*. EMBO Rep, 2012. **13**(11): p.  
776 1004-11.
- 777 19. Chen, Z.J., *Ubiquitin signalling in the NF-kappaB pathway*. Nat Cell Biol, 2005.  
778 **7**(8): p. 758-65.
- 779 20. McInnes, I.B. and G. Schett, *MECHANISMS OF DISEASE The Pathogenesis of*  
780 *Rheumatoid Arthritis*. New England Journal of Medicine, 2011. **365**(23): p.  
781 2205-2219.
- 782 21. Juhasz, K., et al., *Casein kinase 2-interacting protein-1, an inflammatory signaling*  
783 *molecule interferes with TNF reverse signaling in human model cells*. Immunology  
784 Letters, 2013. **152**(1): p. 55-64.
- 785 22. Brennan, F.M. and I.B. McInnes, *Evidence that cytokines play a role in rheumatoid*  
786 *arthritis*. J Clin Invest, 2008. **118**(11): p. 3537-45.
- 787 23. Shen, F., et al., *Cytokines link osteoblasts and inflammation: microarray analysis*  
788 *of interleukin-17- and TNF-alpha-induced genes in bone cells*. J Leukoc Biol, 2005.  
789 **77**(3): p. 388-99.
- 790 24. Confalone, E., G. D'Alessio, and A. Furia, *IL-6 Induction by TNFalpha and*  
791 *IL-1beta in an Osteoblast-Like Cell Line*. Int J Biomed Sci, 2010. **6**(2): p. 135-40.
- 792 25. Alvarez, S.E., et al., *Sphingosine-1-phosphate is a missing cofactor for the E3*  
793 *ubiquitin ligase TRAF2*. Nature, 2010. **465**(7301): p. 1084-8.
- 794 26. Baum, R. and E.M. Gravallese, *Impact of inflammation on the osteoblast in*  
795 *rheumatic diseases*. Curr Osteoporos Rep, 2014. **12**(1): p. 9-16.
- 796 27. Apparailly, F. and C. Jorgensen, *siRNA-based therapeutic approaches for*

- 797 *rheumatic diseases*. Nature Reviews Rheumatology, 2013. **9**(1): p. 56-62.
- 798 28. Zhou, X., et al., *Multiple functions of Osterix are required for bone growth and*  
799 *homeostasis in postnatal mice*. Proceedings of the National Academy of Sciences  
800 of the United States of America, 2010. **107**(29): p. 12919-12924.
- 801 29. Hardy, R.S., et al., *Characterisation of fibroblast-like synoviocytes from a murine*  
802 *model of joint inflammation*. Arthritis Research & Therapy, 2013. **15**(1).
- 803 30. Berger, M., et al., *Neutrophils Express Distinct RNA Receptors in a Non-canonical*  
804 *Way*. Journal of Biological Chemistry, 2012. **287**(23): p. 19409-19417.
- 805 31. Zhang, L., et al., *CKIP-1 recruits nuclear ATM partially to the plasma membrane*  
806 *through interaction with ATM*. Cell Signal, 2006. **18**(9): p. 1386-95.
- 807 32. Takeuchi, M., M. Rothe, and D.V. Goeddel, *Anatomy of TRAF2. Distinct domains*  
808 *for nuclear factor-kappaB activation and association with tumor necrosis factor*  
809 *signaling proteins*. J Biol Chem, 1996. **271**(33): p. 19935-42.
- 810 33. Sondarva, G., et al., *TRAF2-MLK3 interaction is essential for TNF-alpha-induced*  
811 *MLK3 activation*. Cell Res, 2010. **20**(1): p. 89-98.
- 812 34. Liu, J., et al., *Increased PLEKHO1 within osteoblasts suppresses*  
813 *Smad-dependent BMP signaling to inhibit bone formation during aging*. Aging Cell,  
814 2017. **16**(2): p. 360-376.
- 815 35. Brand, D.D., K.A. Latham, and E.F. Rosloniec, *Collagen-induced arthritis*. Nature  
816 Protocols, 2007. **2**(5): p. 1269-1275.
- 817 36. Inglis, J.J., et al., *Collagen-induced arthritis in C57BL/6 mice is associated with a*  
818 *robust and sustained T-cell response to type II collagen*. Arthritis Res Ther, 2007.

- 819                   **9(5).**
- 820           37.   Lee, D.M., et al., *Mast cells: A cellular link between autoantibodies and*  
821                   *inflammatory arthritis*. Science, 2002. **297**(5587): p. 1689-1692.
- 822           38.   Johnsen, A.K., et al., *Genome-Wide and Species-Wide Dissection of the Genetics*  
823                   *of Arthritis Severity in Heterogeneous Stock Mice*. Arthritis and Rheumatism, 2011.  
824                   **63**(9): p. 2630-2640.
- 825           39.   Kato, A., et al., *Early effects of tocilizumab on bone and bone marrow lesions in a*  
826                   *collagen-induced arthritis monkey model*. Experimental and Molecular Pathology,  
827                   2008. **84**(3): p. 262-270.
- 828           40.   Horai, N., et al., *Muscle wasting associated with pathologic change is a risk factor*  
829                   *for the exacerbation of joint swelling in collagen-induced arthritis in cynomolgus*  
830                   *monkeys*. BMC Musculoskeletal Disorders, 2013. **14**.
- 831           41.   Rau, R. and G. Herborn, *Development and evaluation of a modified version of*  
832                   *Larsen's scoring method to assess radiologic changes in rheumatoid arthritis*.  
833                   Zeitschrift Fur Rheumatologie, 1997. **56**(3): p. 127-135.
- 834           42.   Rioja, I., et al., *Joint cytokine quantification in two rodent arthritis models: kinetics*  
835                   *of expression, correlation of mRNA and protein levels and response to*  
836                   *prednisolone treatment*. Clin Exp Immunol, 2004. **137**(1): p. 65-73.
- 837           43.   Zhang, G., et al., *Continuous occurrence of both insufficient neovascularization*  
838                   *and elevated vascular permeability in rabbit proximal femur during inadequate*  
839                   *repair of steroid-associated osteonecrotic lesions*. Arthritis Rheum, 2009. **60**(10):  
840                   p. 2966-77.

- 841 44. Walsh, N.C., et al., *Osteoblast function is compromised at sites of focal bone*  
842 *erosion in inflammatory arthritis*. J Bone Miner Res, 2009. **24**(9): p. 1572-85.
- 843 45. Poliachik, S.L., et al., *Transient muscle paralysis disrupts bone homeostasis by*  
844 *rapid degradation of bone morphology*. Bone, 2010. **46**(1): p. 18-23.
- 845 46. Guma, M., et al., *Caspase 1-Independent Activation of Interleukin-1 beta in*  
846 *Neutrophil-Predominant Inflammation*. Arthritis and Rheumatism, 2009. **60**(12): p.  
847 3642-3650.
- 848



849 **Acknowledgments**

850 We thank the technical staff from Institute for Advancing Translational Medicine in Bone & Joint  
851 Diseases, Hong Kong Baptist University and Institute of Basic Theory, China Academy of Chinese  
852 Medical Sciences for providing critical comments and technical support. This study was supported by  
853 the Hong Kong General Research Fund (HKBU479111 to G.Z., HKBU478312 to G.Z., HKBU  
854 12114416 to G.Z., HKBU262913 to G.Z., HKBU261113 to A.L., HKBU12122516 to A.L.), the Natural  
855 Science Foundation Council of China (81272045 to G.Z. and 81470072 to X.H.), the Research  
856 Grants Council & Natural Science Foundation Council of China (N\_HKBU435/12 to G.Z.), the Hong  
857 Kong Baptist University Strategic Development Fund (SDF) (SDF15-0324-P02 to A.L.).

858

859 **Author Contributions**

860 G.Z. and A.L. supervised the whole project. X.H., J.L., C.L., S.A.B., K.Z. and L.D. performed the  
861 major research and wrote the manuscript in equal contribution. B.G., D.L., C.L., Q.G. and D.F.  
862 provided the technical support. Y.B., H.F., L.X. and X.P. collected human bone specimens. C.X. and  
863 B.Z. provided their professional expertise.

864

865 **Competing financial interests**

866 The authors declare no competing financial interests.

**a**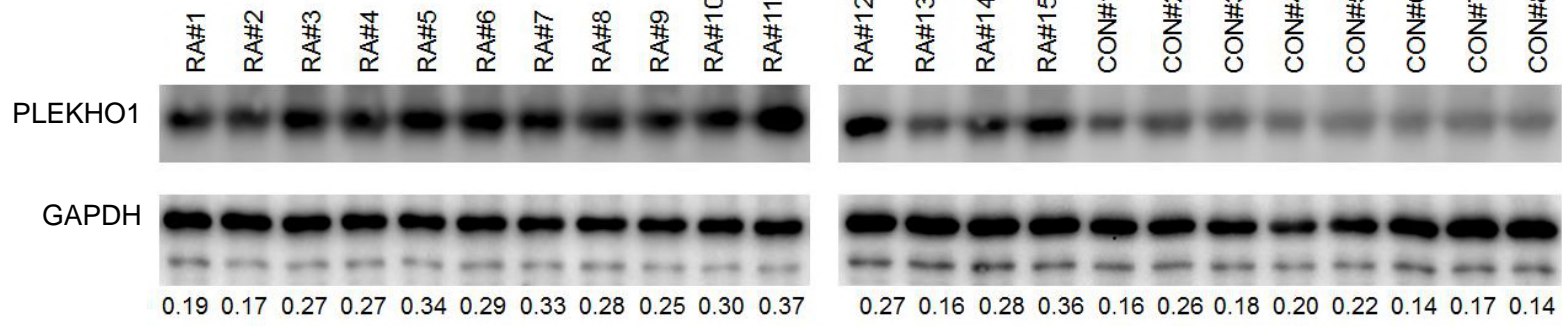**b**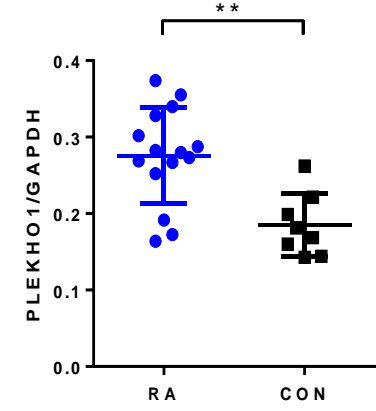**c**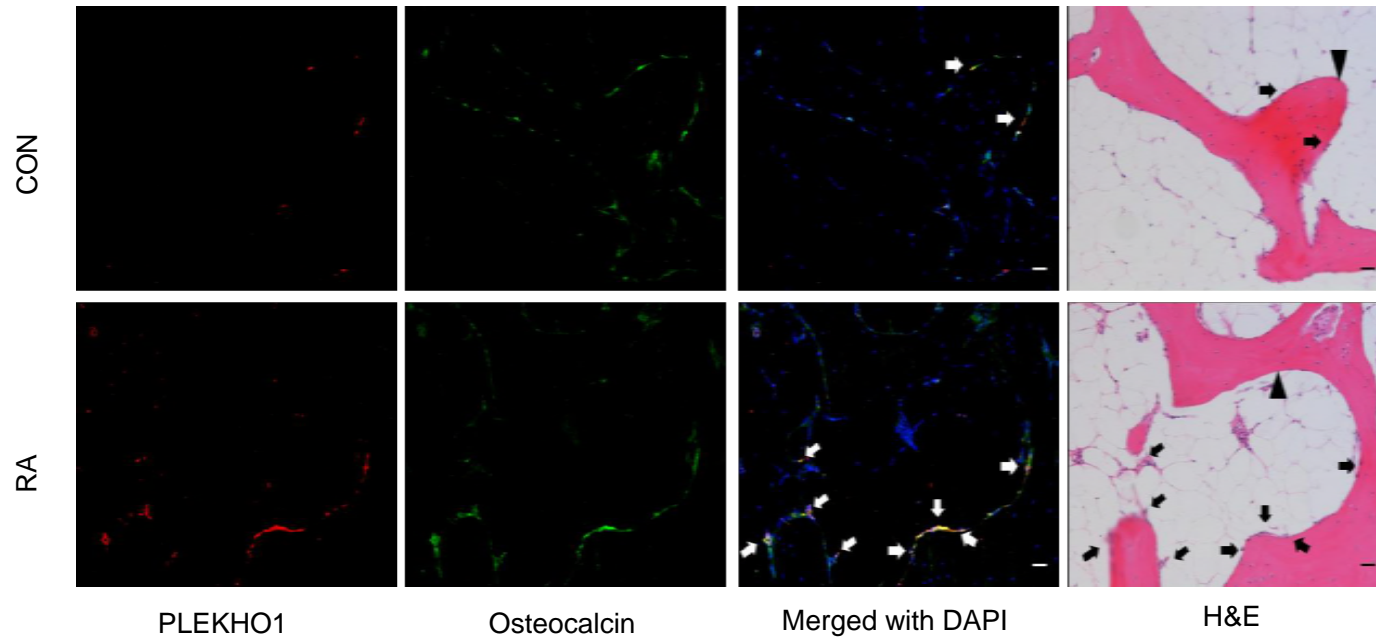**d**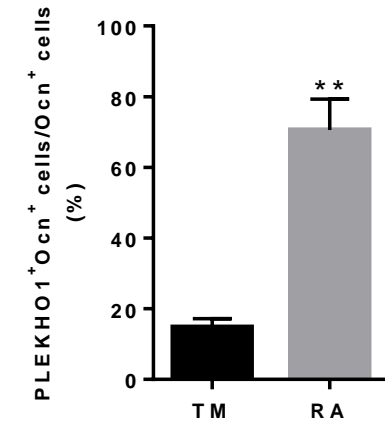

**e**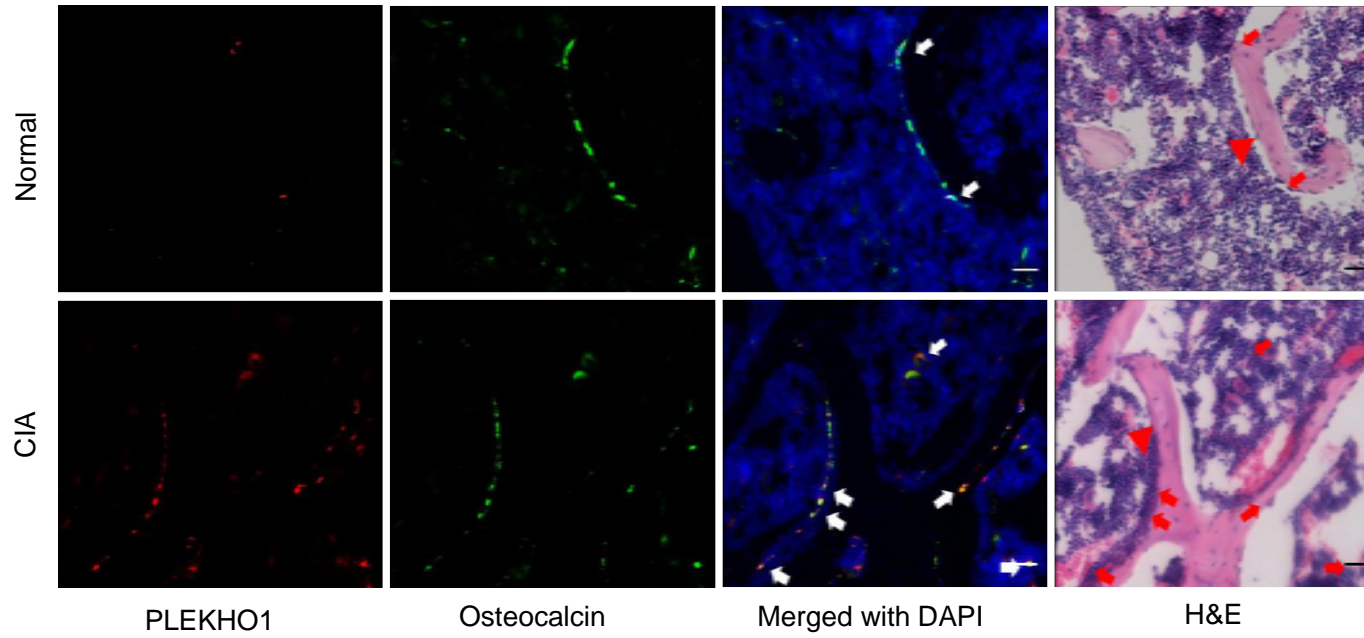**f**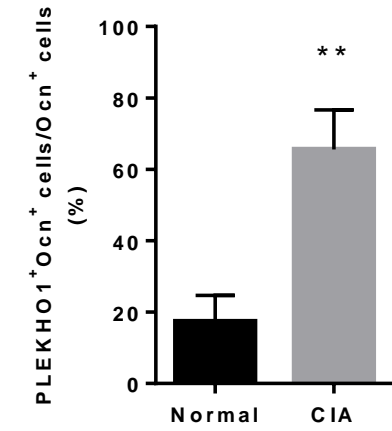**g**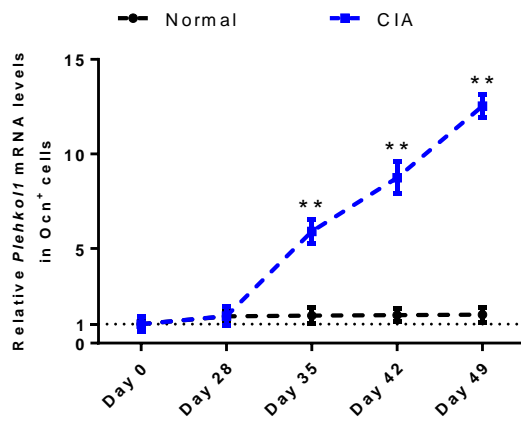**h**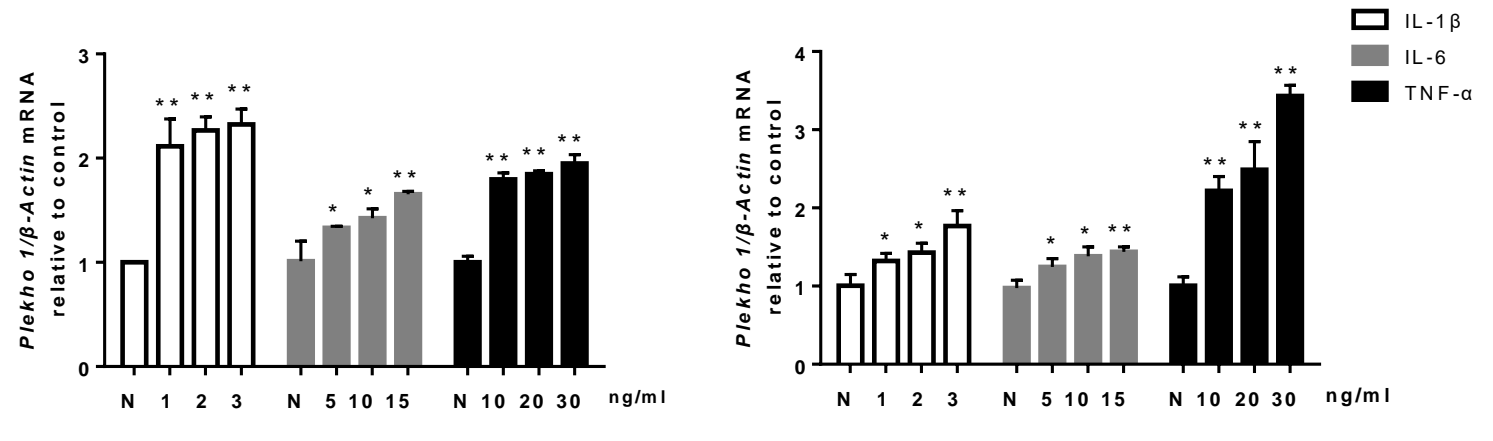

**Figure 1** Highly expressed PLEKHO1 in osteoblasts of RA patients and CIA mice. **(a,b)** Comparison of PLEKHO1 levels in bone tissues from knee joint between RA and TM patients underwent knee joint replacement surgery by western blot. **a**, Representative electrophoretic bands of the samples from fifteen RA patients and eight TM patients are shown. The numbers below the bands represent a semiquantitative value. **b**, The semiquantitative data of the protein levels. **(c,d)** Comparison of PLEKHO1 expression (red) within osteocalcin positive (Ocn<sup>+</sup>) osteoblasts (green) in bone tissues from knee joint between RA and TM patients by immunofluorescence analysis. **c**, Representative fluorescent micrographs of the samples from five RA patients and five TM patients are shown. Merged images with DAPI staining showed co-staining of PLEKHO1 and Ocn<sup>+</sup> osteoblasts (arrows, yellow). H&E staining of the same sections is shown, and black arrowheads point to bone-formation surfaces, enriched by those cells with pink, which is a merged color of green (osteoblast marker) and blue (DAPI staining for nuclei) in the immunofluorescence staining. Scale bars, 20  $\mu$ m. **d**, Comparison of the percentage of cells co-expressing Ocn and PLEKHO1 in Ocn<sup>+</sup> cells from bone tissues of knee joint between RA patients and TM patients. **(e,f)** Comparison of PLEKHO1 expression (red) within Ocn<sup>+</sup> osteoblasts (green) in bone tissues of ankle joint from hind paws of CIA and normal mice on day 49 after primary immunization by immunofluorescence analysis. **e**, Representative fluorescent micrographs of the bone samples from ten CIA mice and ten normal mice are shown. Merged images with DAPI staining showed co-staining of PLEKHO1 and Ocn<sup>+</sup> osteoblasts (arrows, yellow). H&E staining of the same sections is shown, and red arrowheads point to bone-formation surfaces. Scale bars: 20  $\mu$ m. **f**, Comparison of the percentage of cells co-expressing Ocn and PLEKHO1 in Ocn<sup>+</sup> cells from bone tissues of ankle joint from hind paws between CIA mice and normal mice on day 49 after primary immunization. **(g)** Time course changes of *Plekho1* mRNA level in Ocn<sup>+</sup> osteoblasts from CIA and normal mice by laser-capture microdissection (LCM) combined with qPCR. **(h)** Levels of *Plekho1* mRNA induced by proinflammatory cytokines (IL-1 $\beta$ , IL-6 and TNF- $\alpha$ ) in human osteoblast-like cell line MG-63 (left) and mouse osteoblast-like cell line MC3T3E1 (right) by real time PCR analysis. N: no cytokines, served as control. Note: RA, rheumatoid arthritis; TM, severe trauma. All data are the mean  $\pm$  s.d. \*P < 0.05, \*\*P < 0.01. Two-way ANOVA with Bonferroni posttests was performed. Comparisons between two groups were performed using a Student's t test.

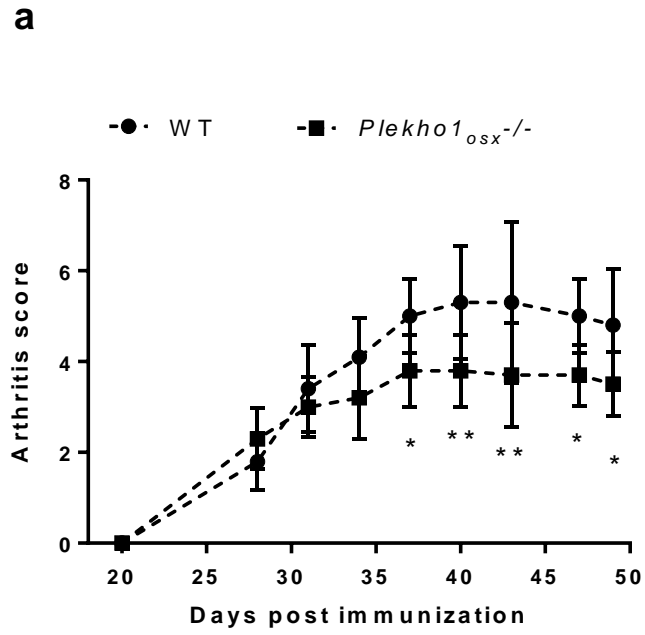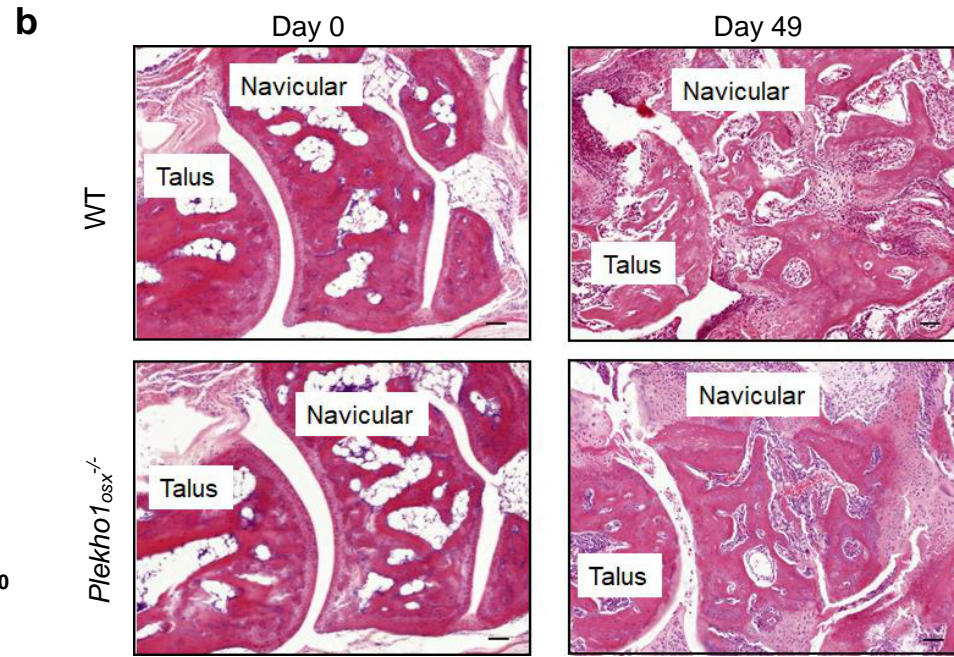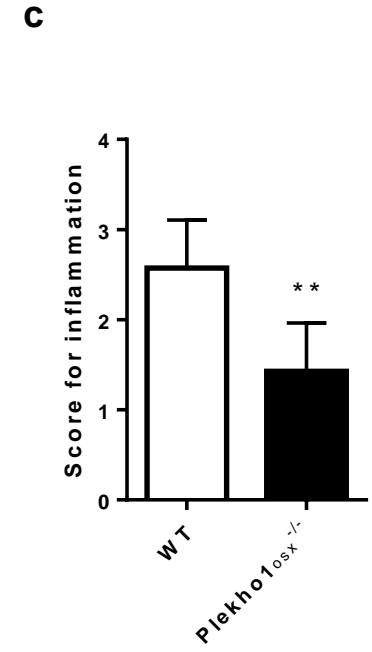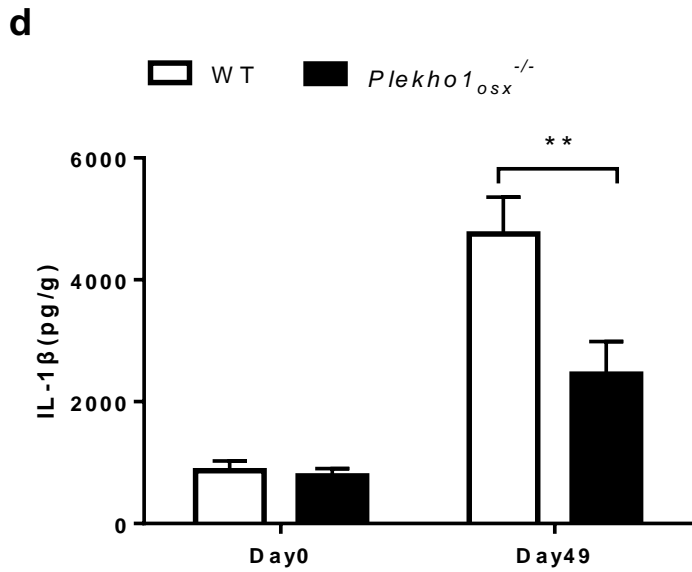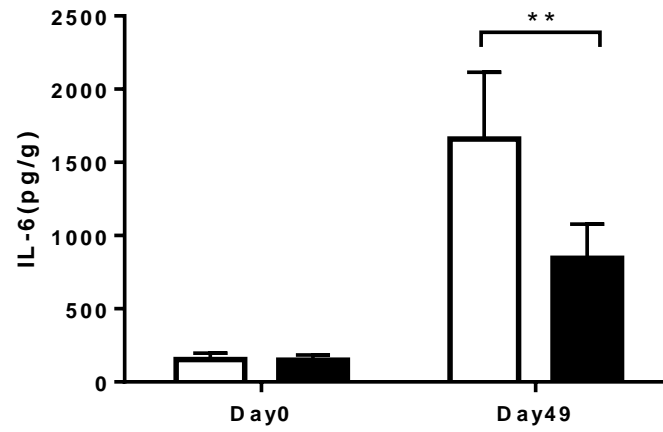

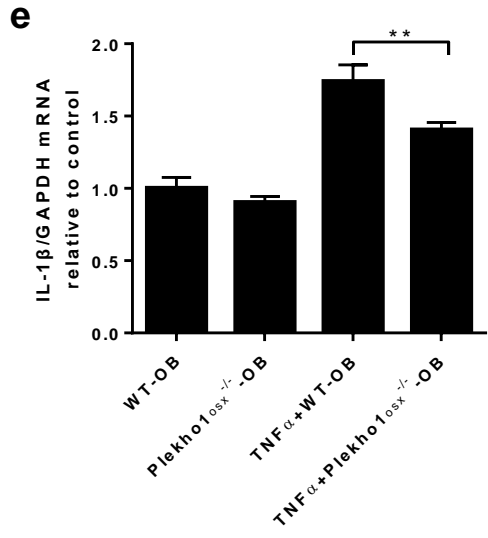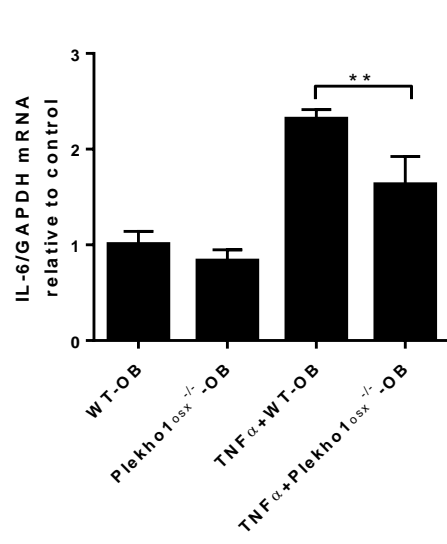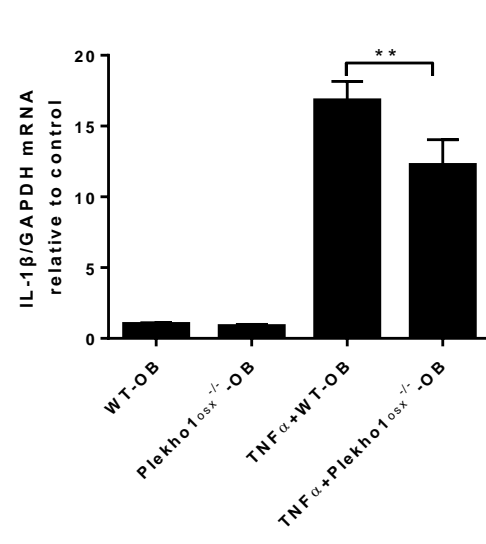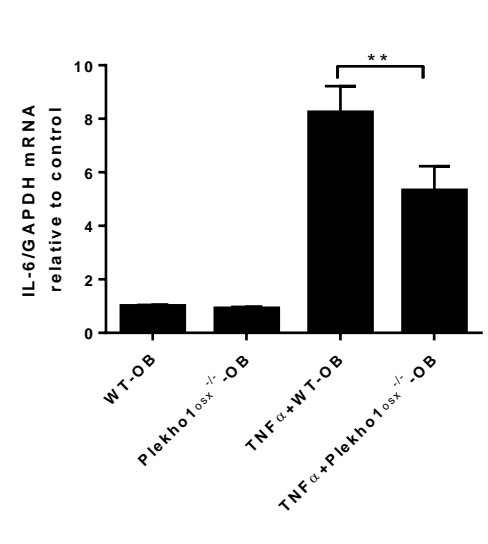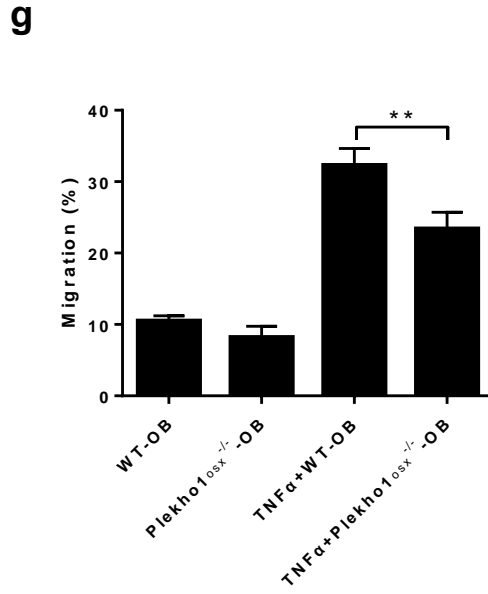

**Figure 2** Genetic deletion of osteoblastic *Plekho1* leads to amelioration of joint inflammation in CIA mice. **(a)** Time course changes in arthritis score from *Plekho1<sub>osx</sub><sup>-/-</sup>* mice and WT mice (including *Plekho1<sup>fl/fl</sup>* mice, *Osx<sup>+/-</sup>;Plekho1<sup>fl/-</sup>* mice, and *Osx<sup>+/-</sup>* mice) after induction with type II chicken collagen. **(b)** Representative histological images in the ankle joint of hind paws from *Plekho1<sub>osx</sub><sup>-/-</sup>*-CIA mice and WT-CIA mice on day 49 after primary immunization. Scale bars, 50 $\mu$ m. **(c)** Histological inflammation score in the ankle joint of hind paws from *Plekho1<sub>osx</sub><sup>-/-</sup>*-CIA mice and WT-CIA mice on day 49 after primary immunization. **(d)** Time course changes of IL-1 $\beta$  and IL-6 levels in the ankle joint of hind paws from *Plekho1<sub>osx</sub><sup>-/-</sup>*-CIA mice and WT-CIA mice by ELISA examination. **(e)** IL-1 $\beta$  and IL-6 mRNA levels in CD4+T lymphocytes after co-culture with osteoblasts from WT mice and *Plekho1<sub>osx</sub><sup>-/-</sup>* mice. **(f)** IL-1 $\beta$  and IL-6 mRNA levels in fibroblast-like synoviocytes after co-culture with osteoblasts from WT mice and *Plekho1<sub>osx</sub><sup>-/-</sup>* mice. **(g)** Migration of neutrophils after co-culture with osteoblasts from WT mice and *Plekho1<sub>osx</sub><sup>-/-</sup>* mice. All data are the mean  $\pm$  s.d.  $n = 10$  per group. \* $P < 0.05$ , \*\* $P < 0.01$ . For **a**, Two-way ANOVA with subsequent Bonferroni posttests was performed. For **c & d**, a Student's t test was performed. For **e-g**, a one-way ANOVA with subsequent Tukey's multiple comparisons test was performed.



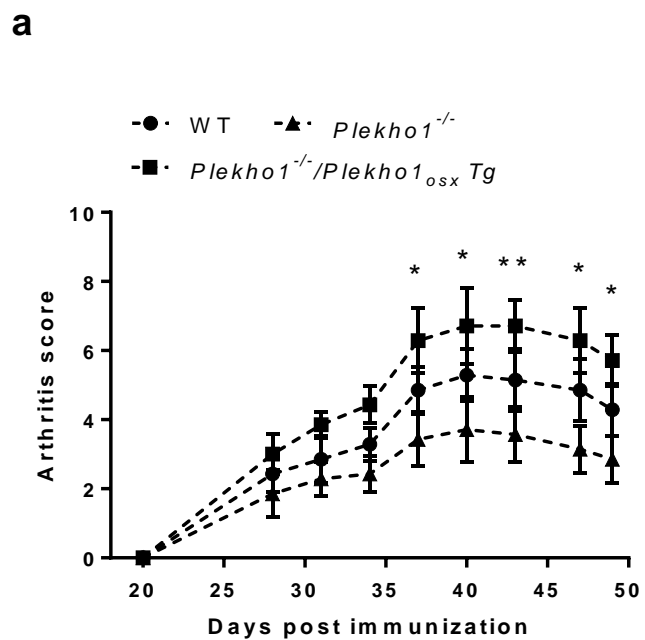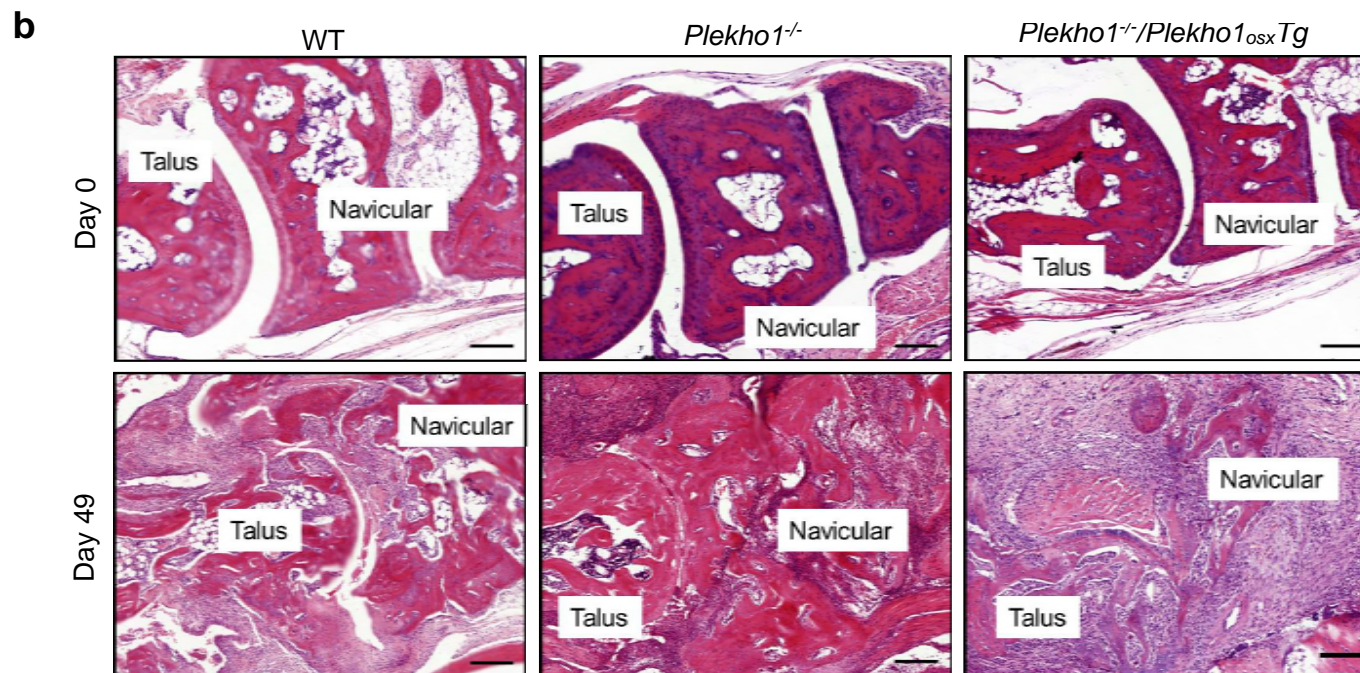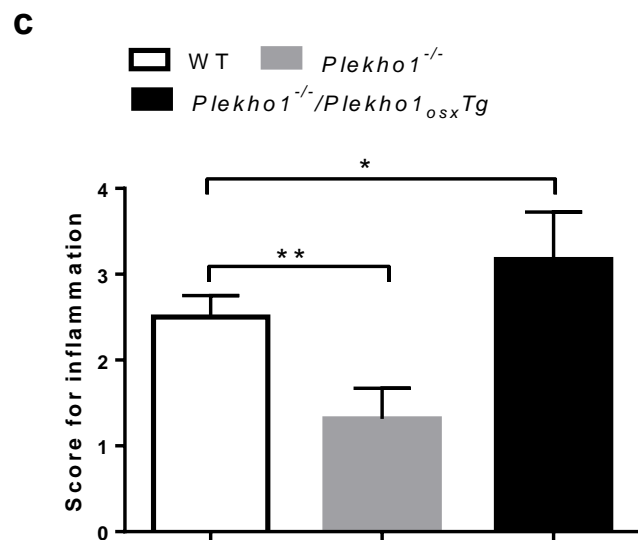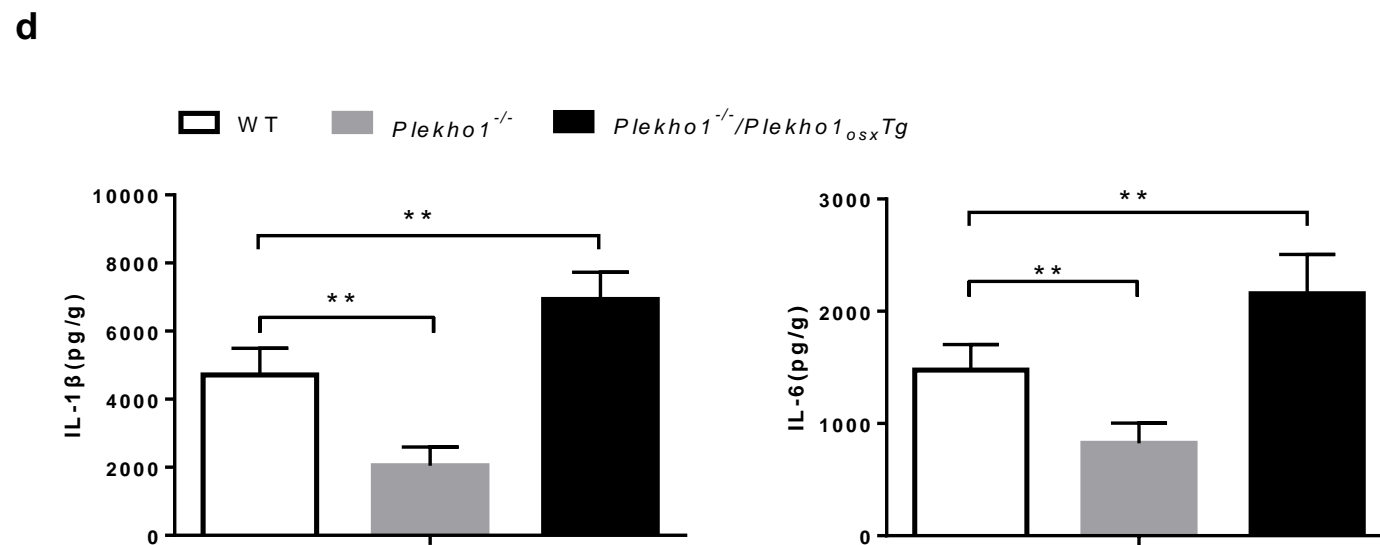



**e**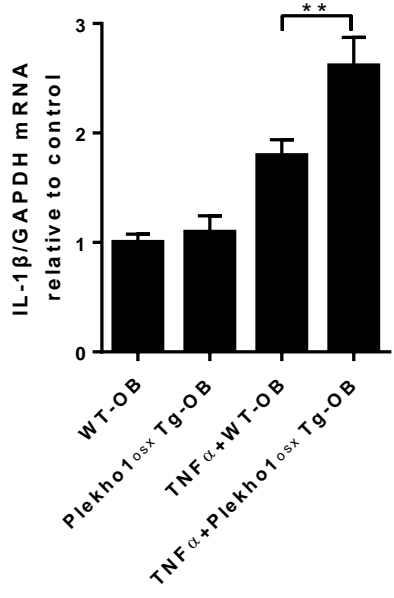**f**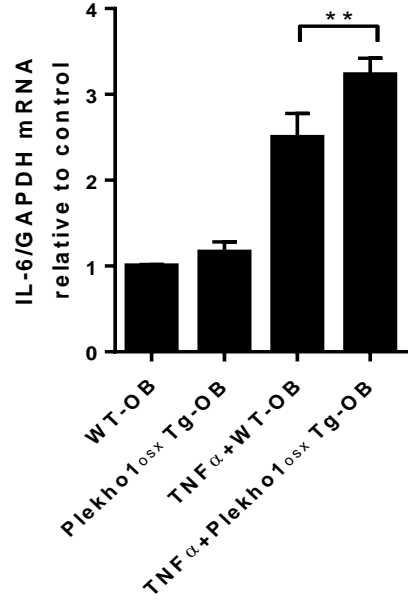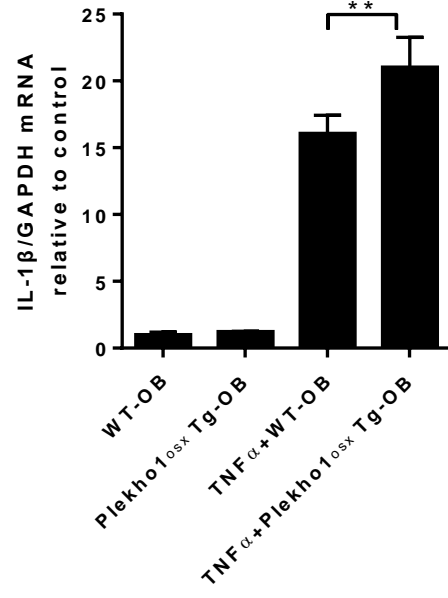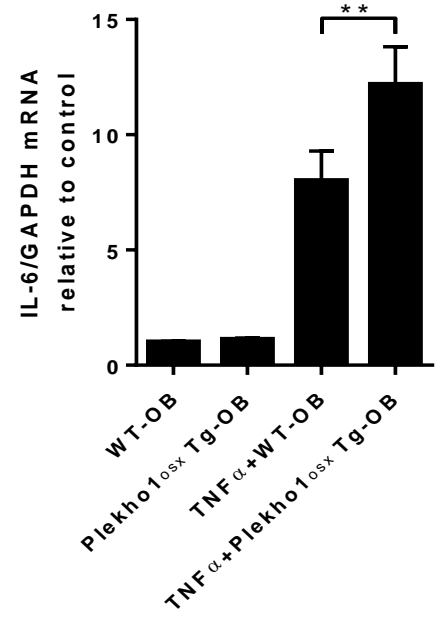**g**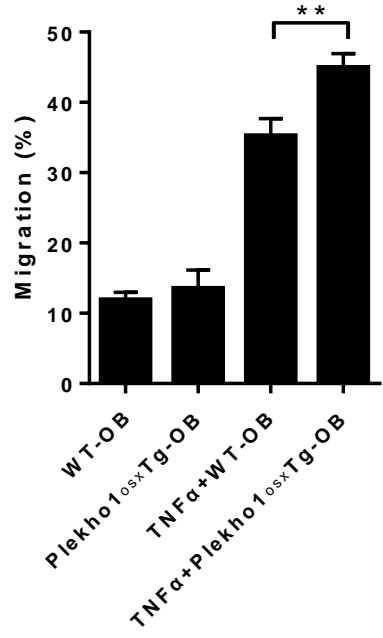

**Figure 3** Overexpressed *Plekho1* in osteoblasts exacerbates inflammation in *Plekho1<sup>-/-</sup>/Plekho1<sub>osx</sub> Tg* mice with CIA. **(a)** Disease progression assessed by arthritic score in WT-CIA, *Plekho1<sup>-/-</sup>*-CIA and *Plekho1<sup>-/-</sup>/Plekho1<sub>osx</sub> Tg*-CIA mice. \*P < 0.05, \*\*P < 0.01, compared to WT-CIA group. **(b)** Representative histological images in the ankle joint of hind paws from WT-CIA, *Plekho1<sup>-/-</sup>*-CIA and *Plekho1<sup>-/-</sup>/Plekho1<sub>osx</sub> Tg*-CIA mice. Scale bars, 50µm. **(c)** Histological inflammation score in the ankle joint of hind paws from WT-CIA, *Plekho1<sup>-/-</sup>*-CIA and *Plekho1<sup>-/-</sup>/Plekho1<sub>osx</sub> Tg*-CIA mice. **(d)** IL-1β and IL-6 levels in the ankle joint of hind paws from WT-CIA, *Plekho1<sup>-/-</sup>*-CIA and *Plekho1<sup>-/-</sup>/Plekho1<sub>osx</sub> Tg*-CIA mice on day 49 after primary immunization by ELISA examination. **(e)** IL-1β and IL-6 mRNA levels in CD4<sup>+</sup>T lymphocytes after co-culture with osteoblasts from WT mice and *Plekho1<sub>osx</sub> Tg* mice. **(f)** IL-1β and IL-6 mRNA levels in fibroblast-like synoviocytes after co-culture with osteoblasts from WT mice and *Plekho1<sub>osx</sub> Tg* mice. **(g)** Migration of neutrophils after co-culture with osteoblasts from WT mice and *Plekho1<sub>osx</sub> Tg* mice. All data are the mean ± s.d. n = 9 per group. \*P < 0.05, \*\*P < 0.01. For **a**, a two-way ANOVA with subsequent Bonferroni posttests was performed. For **c-g**, a one-way ANOVA with subsequent Tukey's multiple comparisons test was performed.

**a**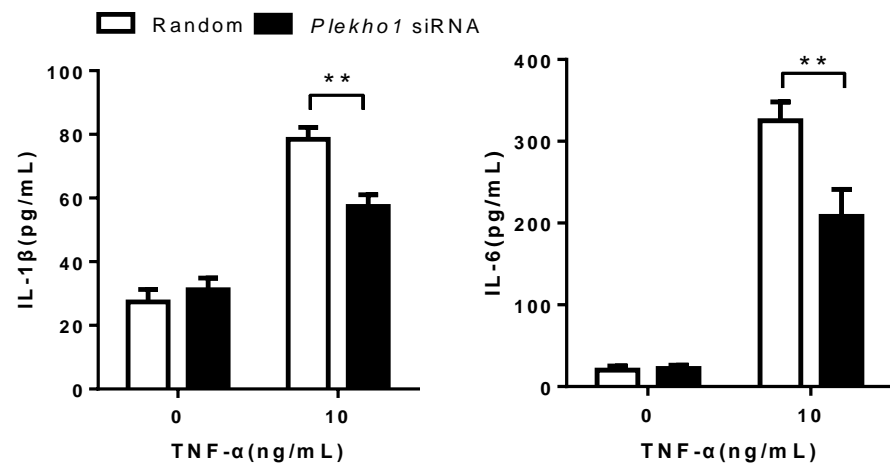**b**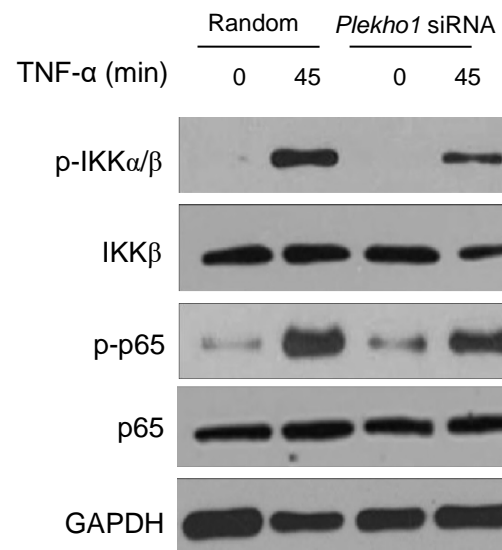**c**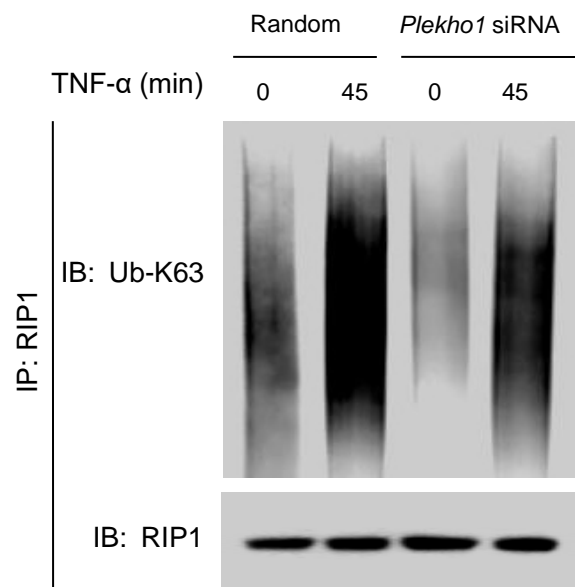**d**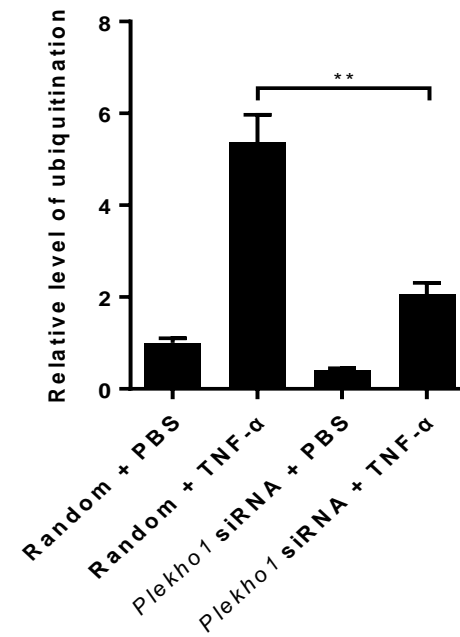

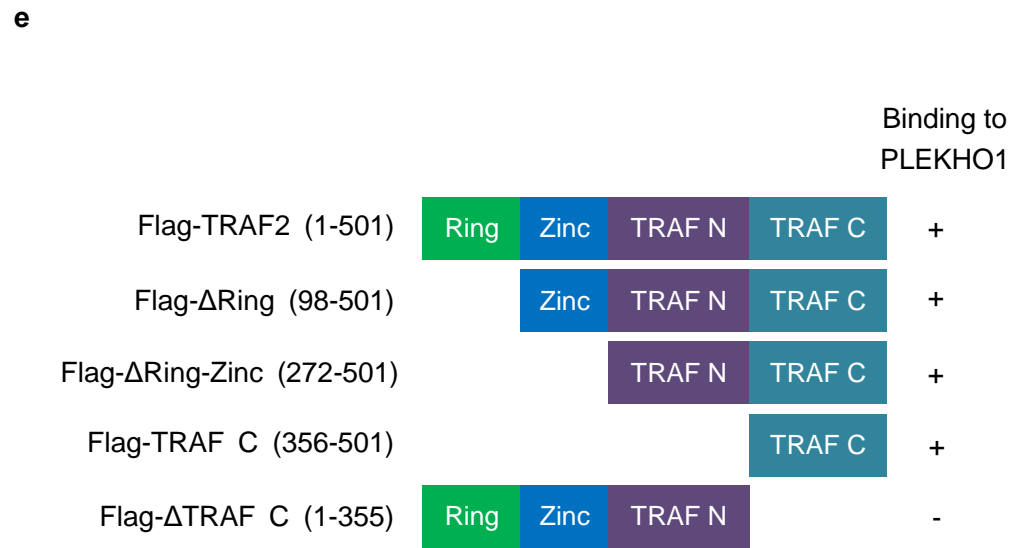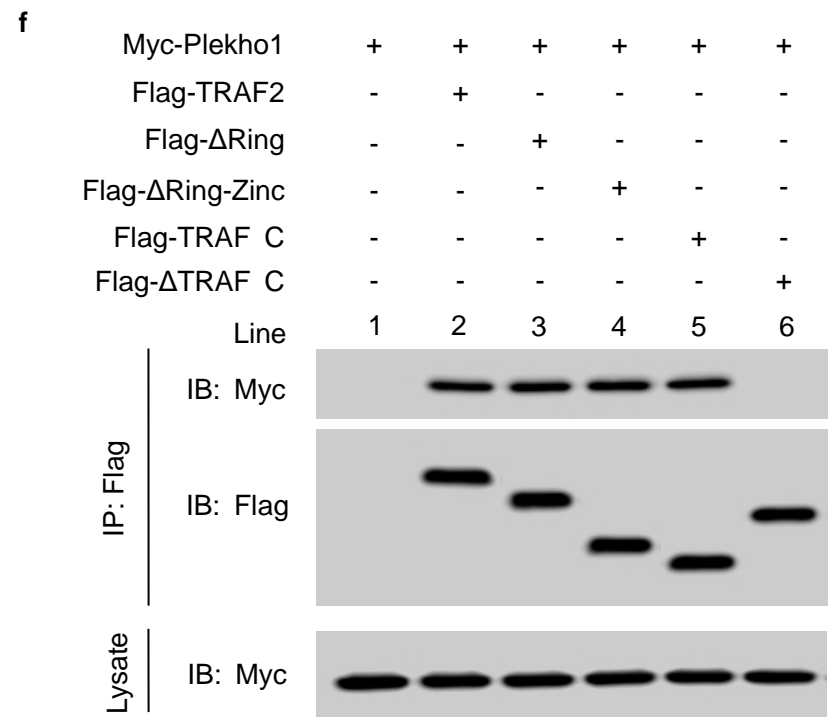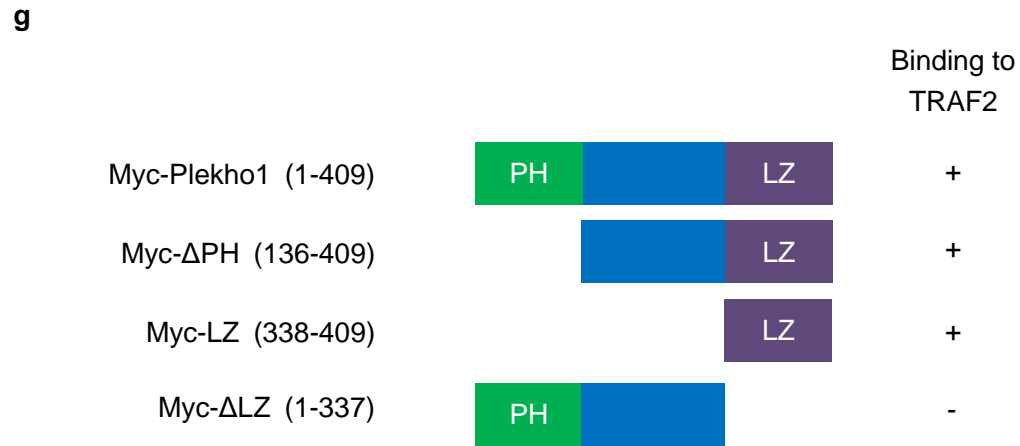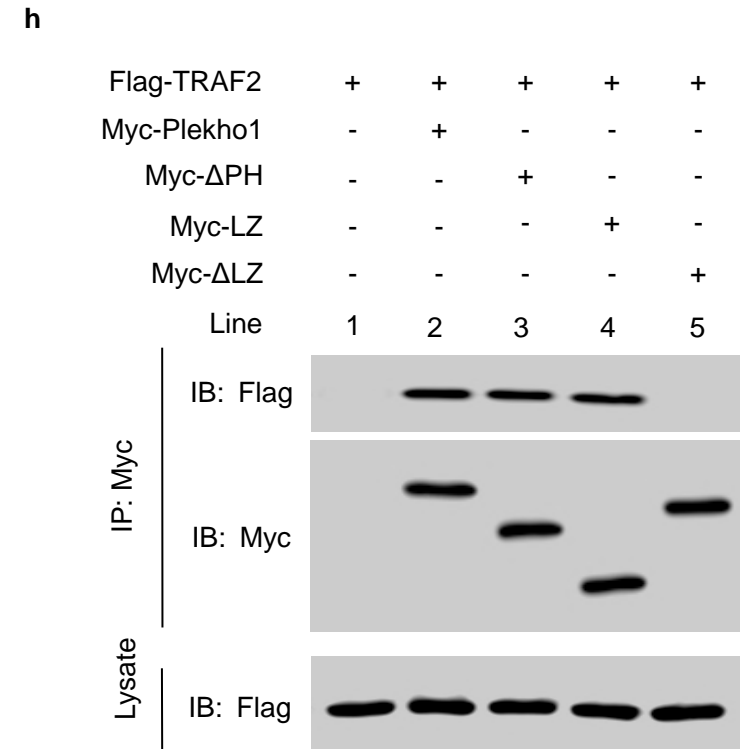

i

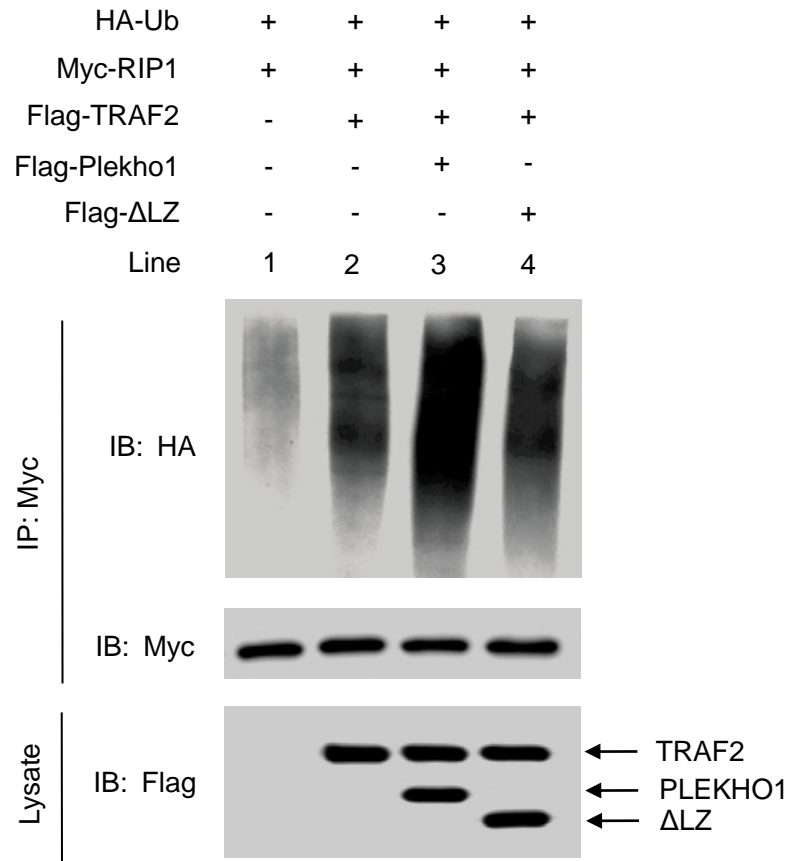

j

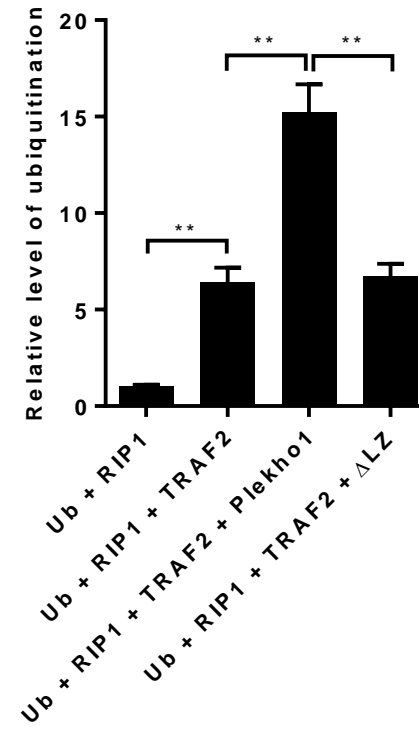

k

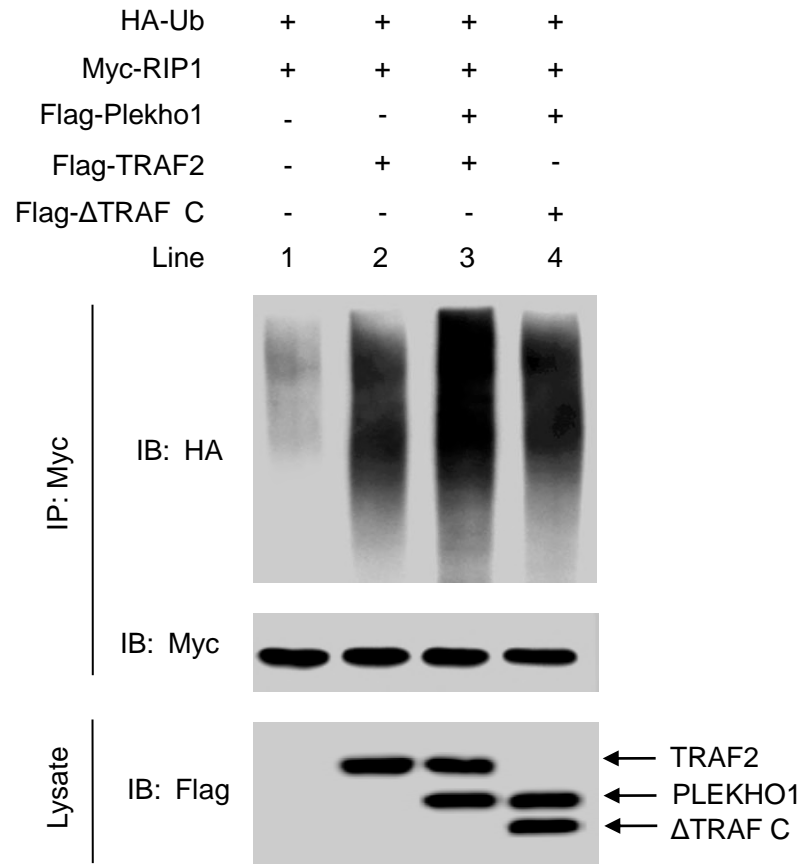

l

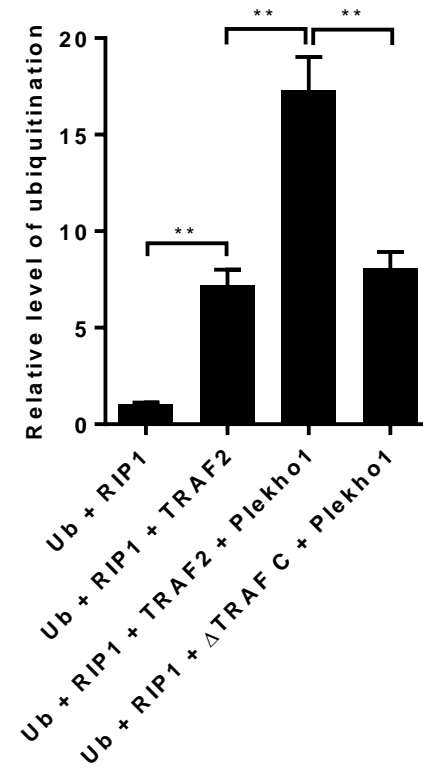

**Figure 4** PLEKHO1 interacts with TRAF2 to promote the TRAF2-mediated ubiquitination of RIP1. **(a)** Levels of inflammatory cytokines (IL-1 $\beta$ , IL-6) produced by MC3T3E1 cells transfected with *Plekho1* siRNA or random siRNA and subjected to TNF- $\alpha$  (10 ng/ml). **(b)** MC3T3E1 cells transfected with *Plekho1* siRNA or random siRNA were stimulated with TNF- $\alpha$  (10 ng/ml) for 45min, and harvested for detection of IKK $\alpha/\beta$  and p65 phosphorylation. **(c)** MC3T3E1 cells transfected with *Plekho1* siRNA or random siRNA were stimulated with TNF- $\alpha$  (10 ng/ml) for 45min, and harvested for detection of RIP1 ubiquitination. **(d)** Quantification of relative level of RIP1 ubiquitination. **(e, f)** Immunoprecipitation using anti-Flag antibody to examine the PLEKHO1-TRAF2 interaction and mapping of the PLEKHO1-interacting domain in TRAF2. **e**, The Flag-tagged full-length TRAF2 (Flag-TRAF2) and various truncated mutants (Flag- $\Delta$ Ring, Flag- $\Delta$ Ring-Zinc, Flag-TRAF N and Flag- $\Delta$ TRAF C) were shown with amino acid numbers. **f**, HEK293T cells were transfected with Myc-Plekho1 and Flag-TRAF2 or truncated mutants as indicated. Full-length TRAF2 or truncated mutants was immunoprecipitated by anti-Flag antibody. PLEKHO1 in immunoprecipitates or whole-cell lysate was detected by anti-Myc antibody. **(g, h)** Immunoprecipitation using anti-Myc antibody to examine the PLEKHO1-TRAF2 interaction and mapping of the TRAF2-interacting domain in PLEKHO1. **g**, The Myc-tagged full-length Plekho1 (Myc-Plekho1) and various truncated mutants (Myc- $\Delta$ PH, Myc-LZ, and Myc- $\Delta$ LZ) were shown with amino acid numbers. **h**, HEK293T cells were transfected with Flag-TRAF2 and Myc-Plekho1 or truncated mutants as indicated. Full-length PLEKHO1 or truncated mutants was immunoprecipitated by anti-Myc antibody. TRAF2 in immunoprecipitates or whole-cell lysate was detected by anti-Flag antibody. **(i)** *In vivo* ubiquitination assay of RIP1 in HEK293T cells transfected with Myc-RIP1, HA-Ubiquitin (HA-Ub) and Flag-TRAF2, along with Flag-Plekho1 or Flag- $\Delta$ LZ. Ubiquitination of RIP1 was detected in Myc immunoprecipitates. **(j)** Quantification of relative level of RIP1 ubiquitination. **(k)** *In vivo* ubiquitination assay of RIP1 in HEK293T cells transfected with Myc-RIP1, HA-Ub and Flag-Plekho1, along with Flag-TRAF2 or Flag- $\Delta$ TRAF C. Ubiquitination of RIP1 was detected in Myc immunoprecipitates. **(l)** Quantification of relative level of RIP1 ubiquitination. Note: IP, Immunoprecipitation; IB, immunoblotting. Data are representative of three independent experiments. \*\*P<0.01. Comparisons between two groups were performed using a Student's t test.

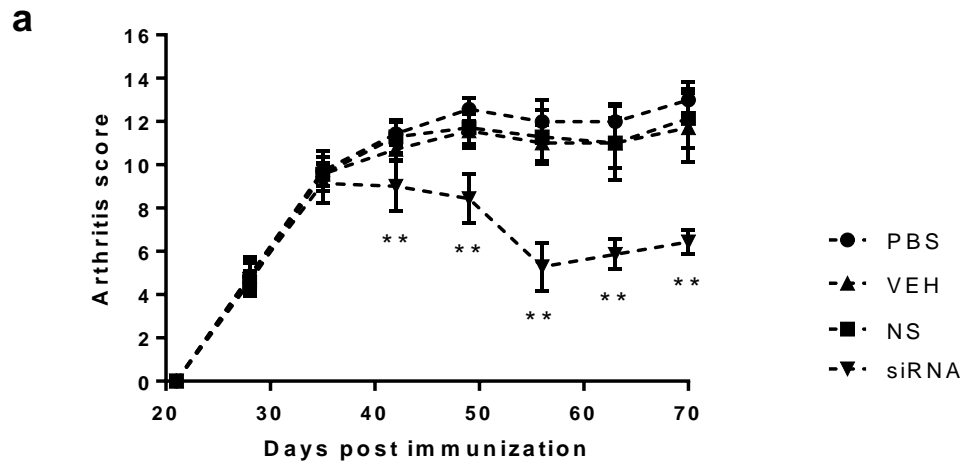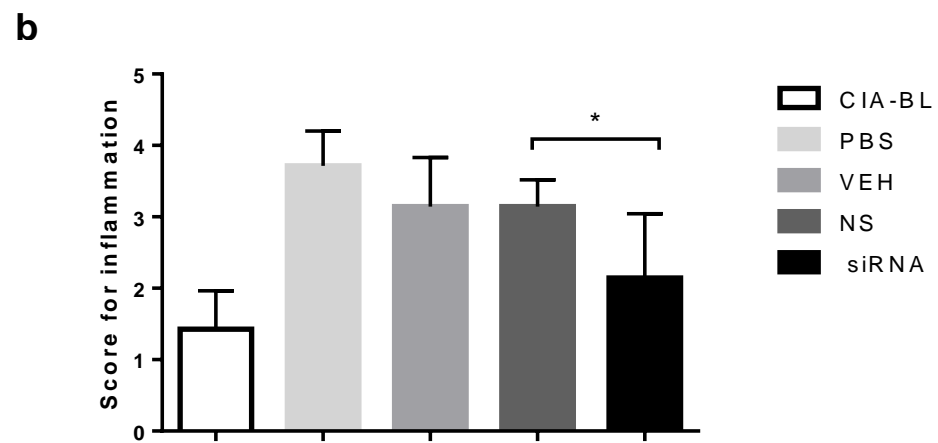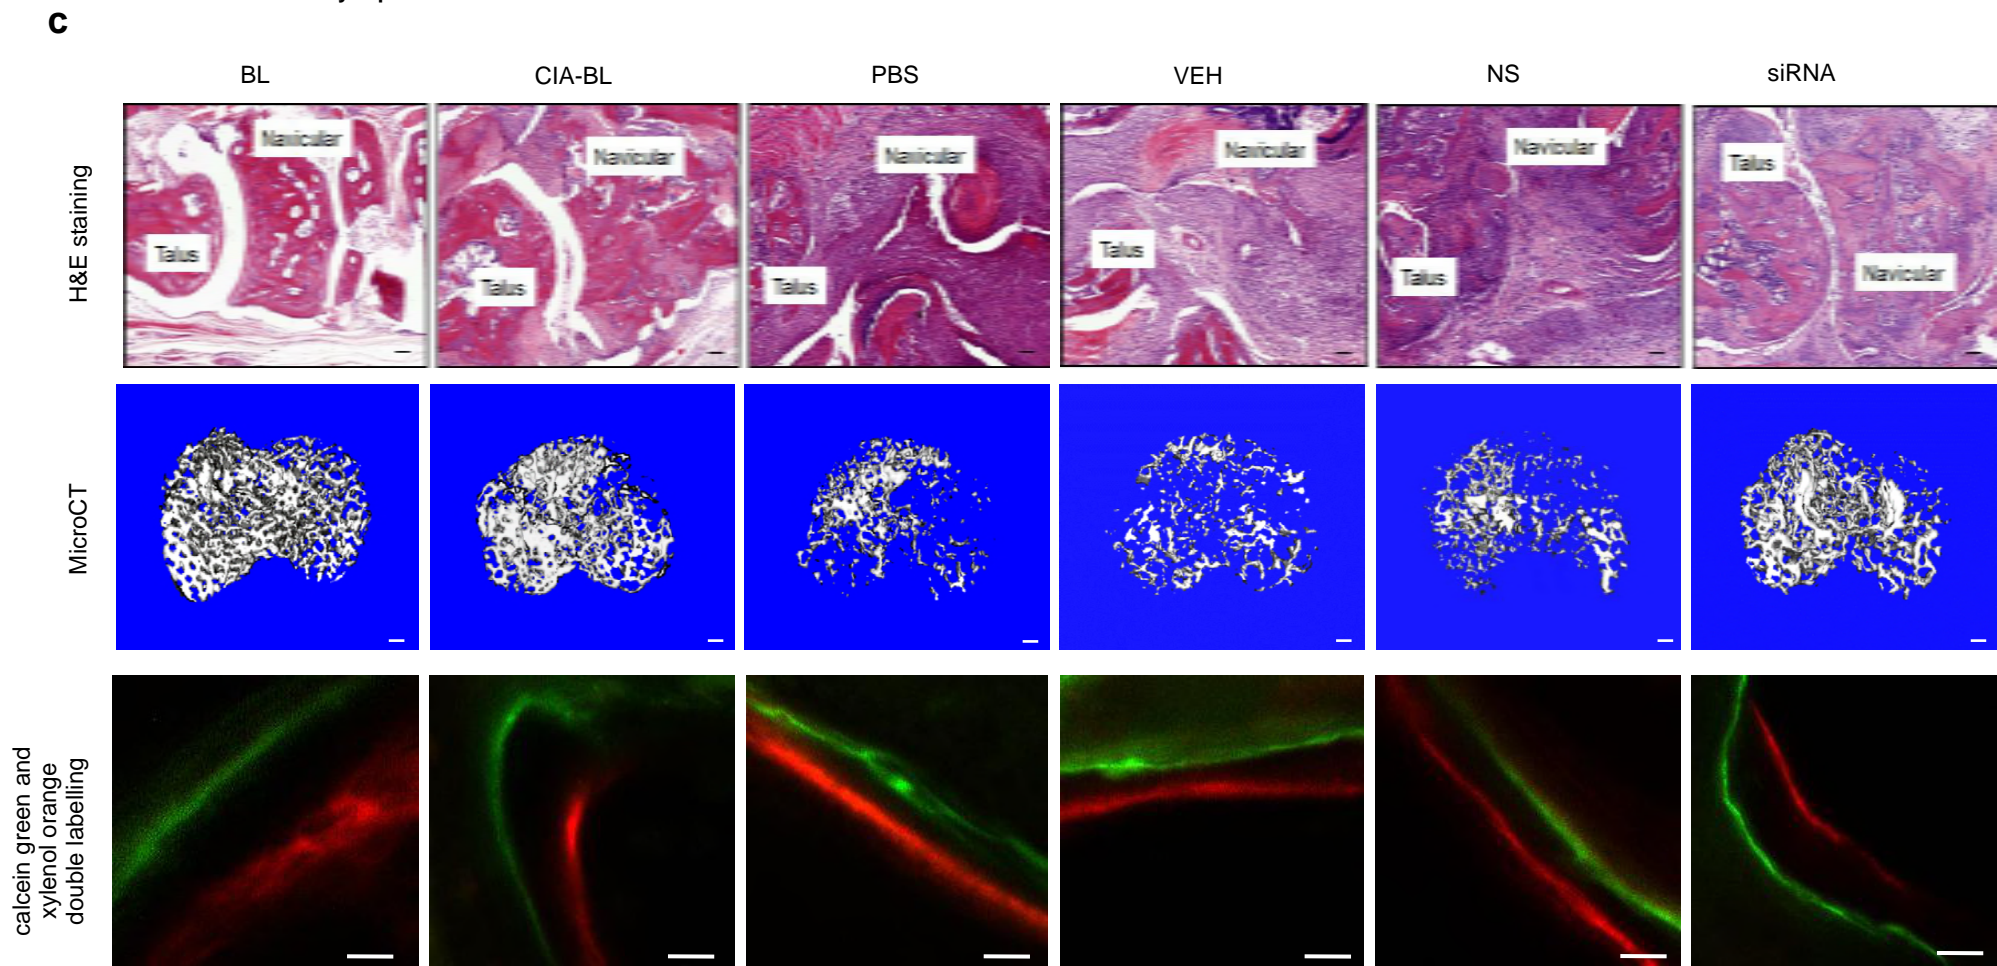



**d**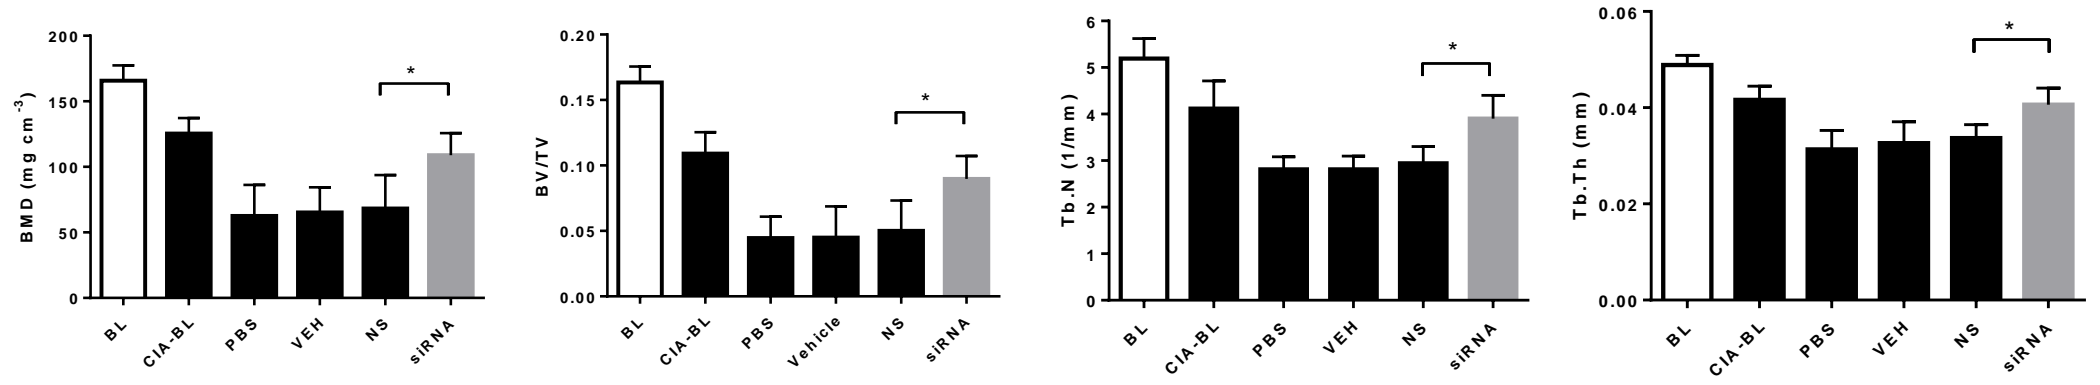**e**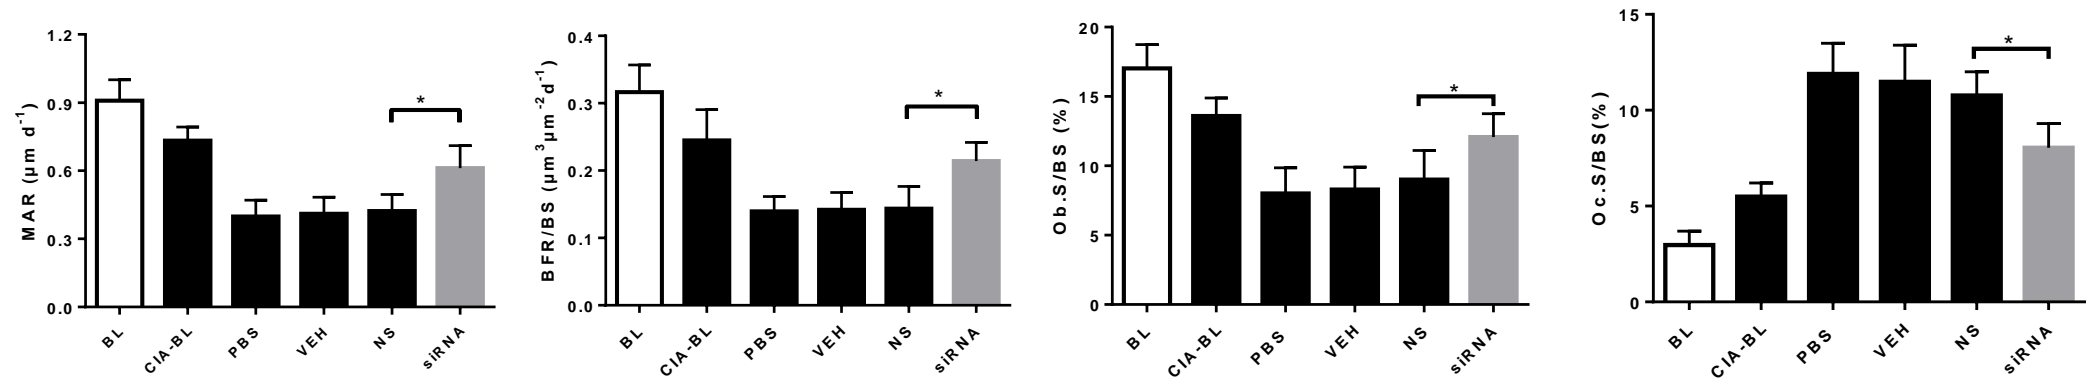

**Figure 5** Osteoblastic PLEKHO1 inhibition leads to amelioration of articular inflammation and promotion of bone formation in CIA mice. **(a)** Time course changes in arthritis score from CIA mice treated with PBS, VEH, NS, and siRNA, respectively. **(b)** Histological inflammation score in the hind paws from the CIA mice after 6-week treatment in the respective group. **(c)** Representative histological images (Scale bars, 50  $\mu$ m), microCT images (proximal tibial bones, Scale bars, 100  $\mu$ m), calcein green and xyleneol orange double labelling (Scale bars, 10  $\mu$ m) from the hind paws of mice in each group at day 70 after primary immunization. **(d)** The values of microCT parameters (BMD, BV/TV, Tb.N and Tb.Th) of the proximal tibial bones from the CIA mice after treatment in the respective group. **(e)** The values of bone histomorphometric parameters (MAR, BFR/BS, Ob.S/BS and Oc.S/BS) in the hind paws from the CIA mice after treatment in the respective group. All data are the mean  $\pm$  s.d. \*P < 0.05, \*\*P < 0.01. *n* = 7 per group. For **a**, a two-way ANOVA with subsequent Bonferroni posttests was performed. For **b,d,e**, a one-way ANOVA with subsequent Tukey's multiple comparisons test was performed. Note: BL, baseline; CIA-BL, collagen-induced arthritis baseline; VEH, (AspSerSer)<sub>6</sub>-liposome; NS, (AspSerSer)<sub>6</sub>-liposome -NS siRNA; siRNA, (AspSerSer)<sub>6</sub>- liposome -*Plekho1* siRNA.

**a**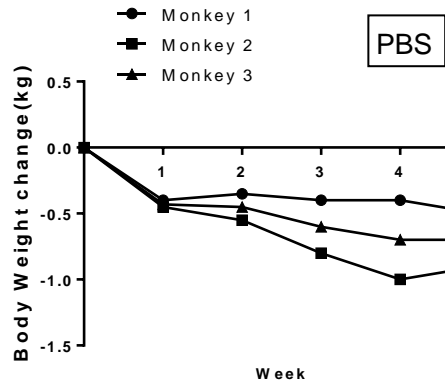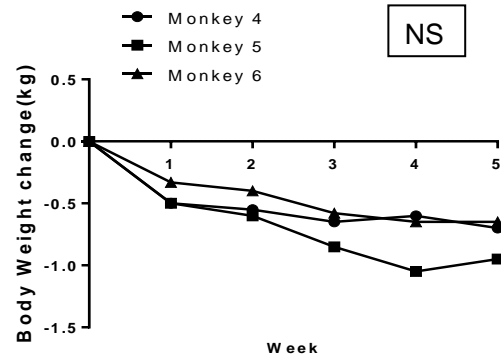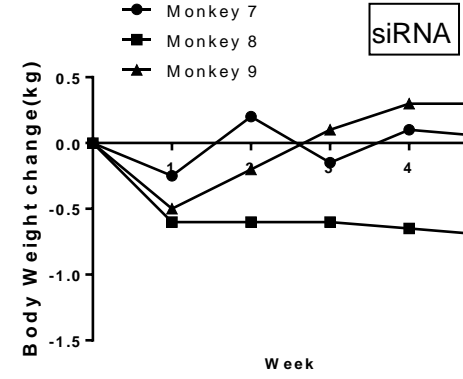**d**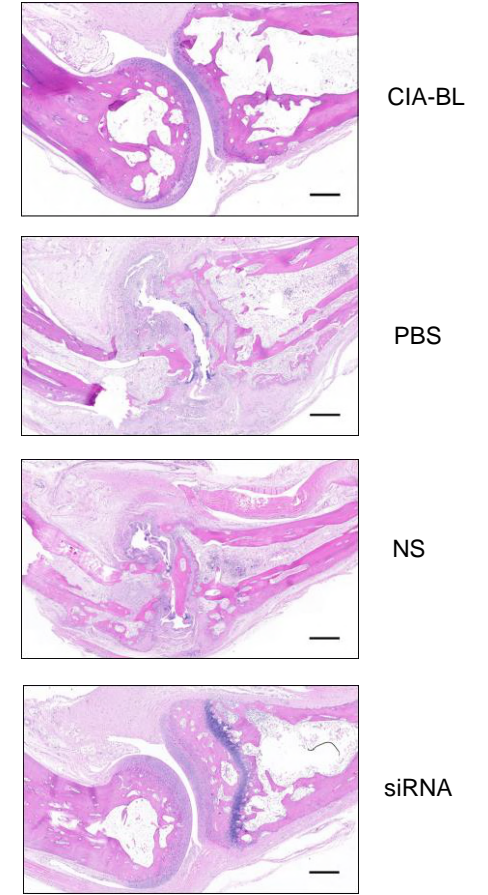**b**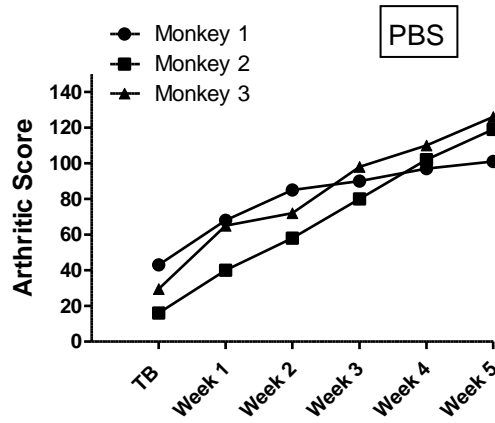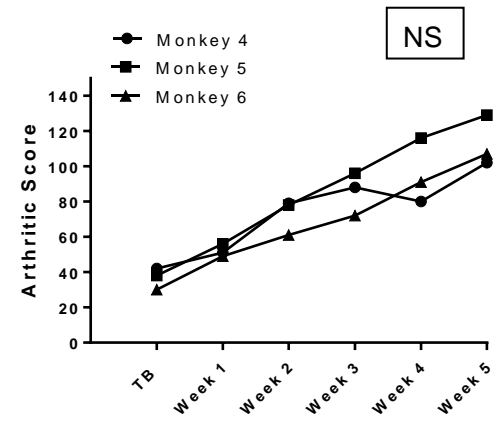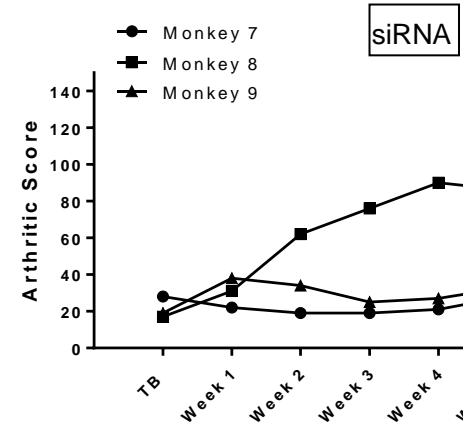**c**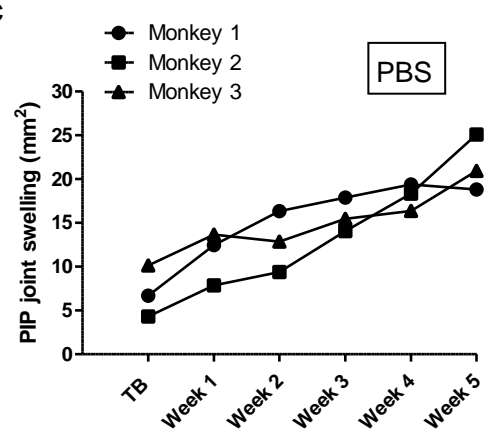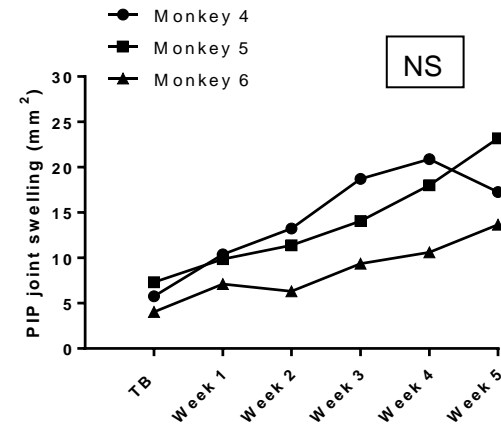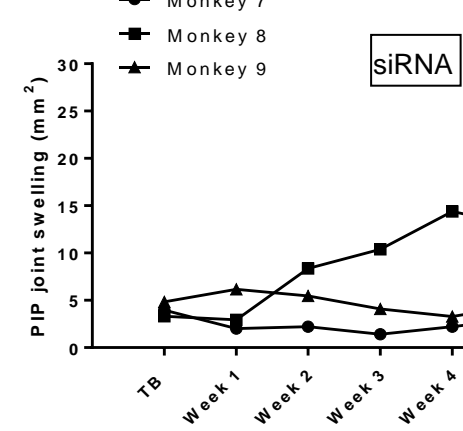**e**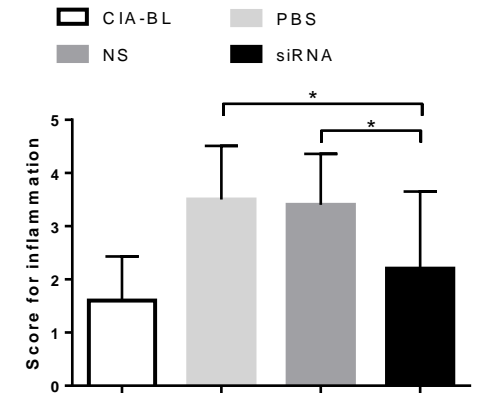

f

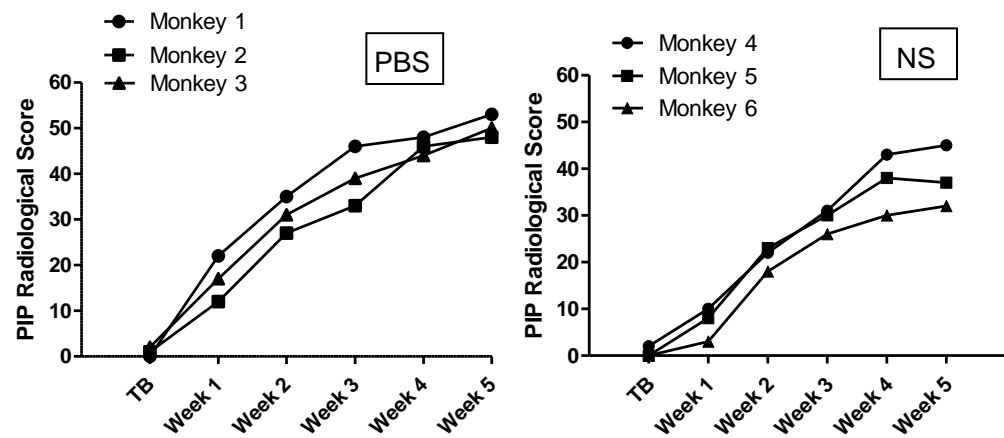

g

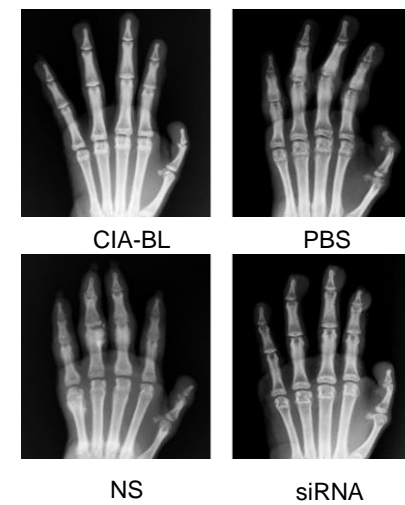

h

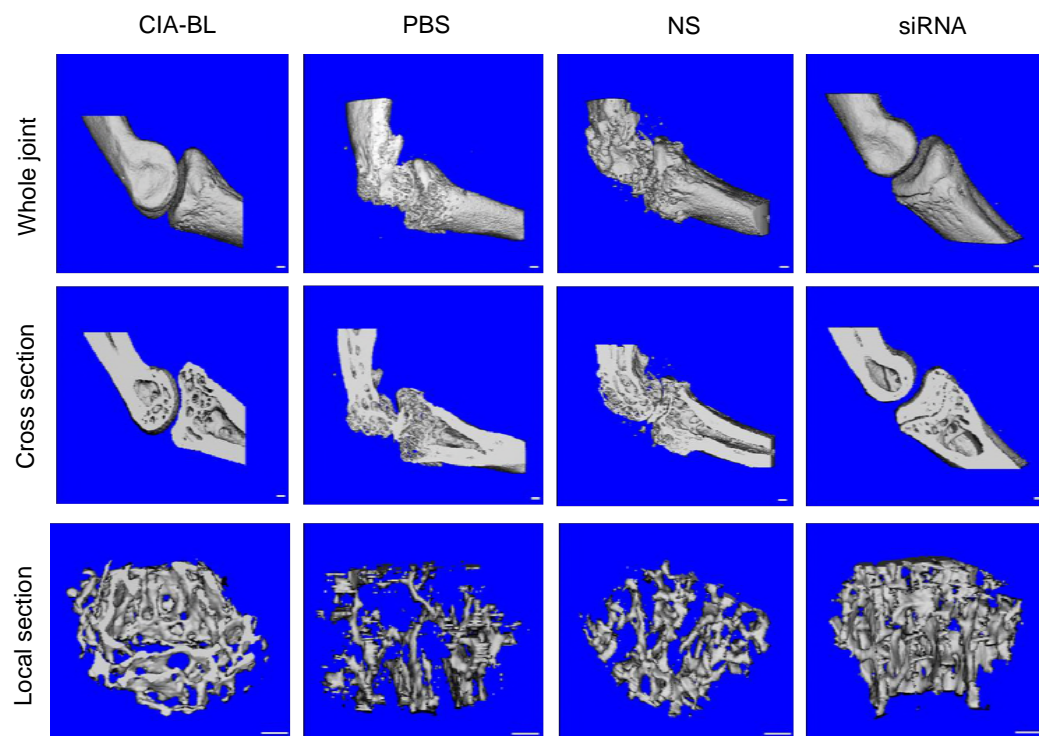

i

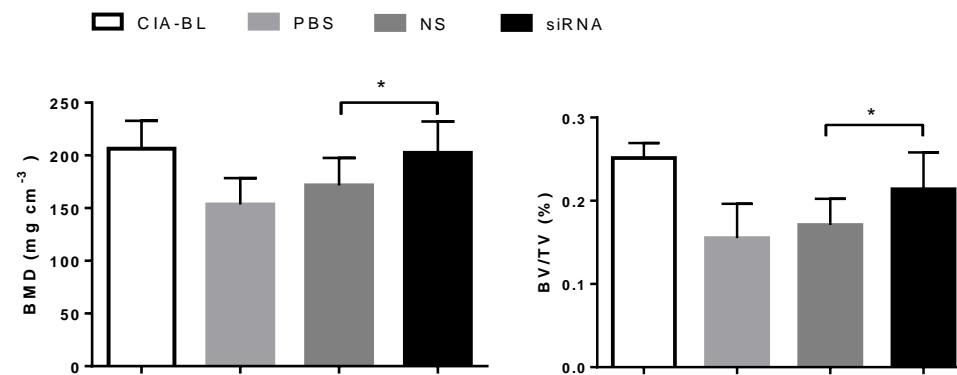

j

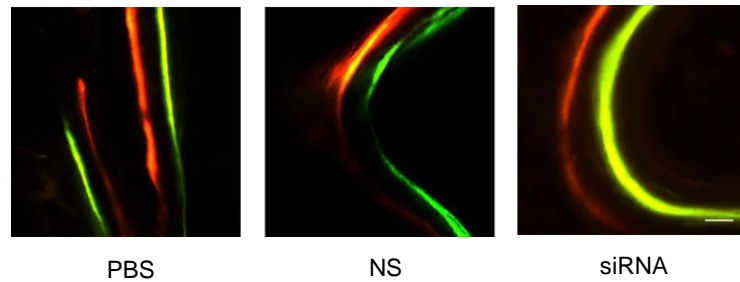

k

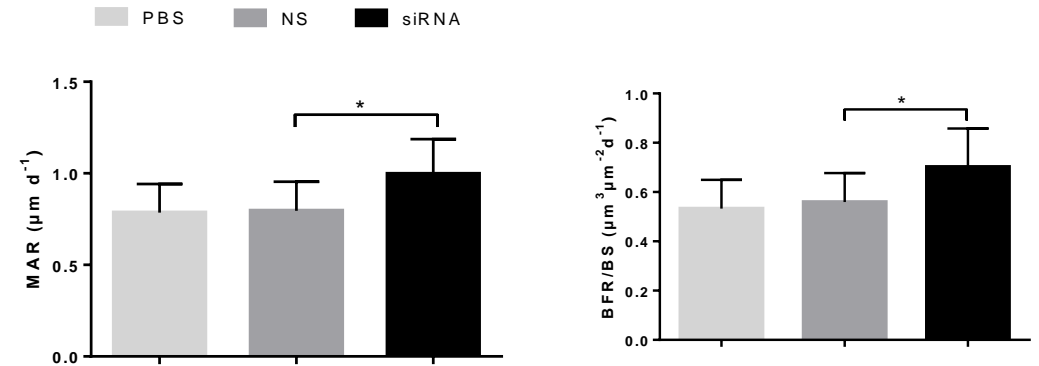

**Figure 6** RNA interference-based silencing of PLEKHO1 with osteoblast-selective delivery rescues articular inflammation and bone erosion in non-human primate arthritis model induced by type II bovine collagen. (a) Body weight monitoring over time of each cynomolgus monkey after treatment. (b) Analysis of arthritis score over time of each cynomolgus monkey after treatment. (c) PIP joints swelling monitoring over time of each cynomolgus monkey after treatment. (d) Representative histological change of PIP joints from the hand of cynomolgus monkey in each group (four PIPs in each cynomolgus monkey, three cynomolgus monkeys in each group). Scale bar, 500  $\mu\text{m}$ . (e) Comparison of histological inflammation score in each group. (f) Radiological score monitoring over time by X ray examination of the hand in each cynomolgus monkey. (g) Representative X ray image of the hand in each group (three cynomolgus monkeys in each group). (h) Representative 3D microarchitecture of the PIP in each group (four PIPs in each cynomolgus monkey, three cynomolgus monkeys in each group), obtained by microCT examination. Scale bars, 1.0 mm. (i) Analysis of the three-dimensional architecture parameters (BMD and BV/TV) for monkeys in each group. (j) Bone formation was examined by sequential labels with fluorescent dye in nondecalcified bone sections from cynomolgus monkeys. Representative fluorescent micrographs of PIP showed the xylenol (red) and calcein (green) labels in each group (four PIPs in each cynomolgus monkey, three cynomolgus monkeys in each group). Scale bar, 10  $\mu\text{m}$ . (j) Analysis of bone histomorphometric parameters (MAR and BFR/BS) from cynomolgus monkeys in each group. All data are the mean  $\pm$  s.d. \* $P < 0.05$ . A one-way ANOVA with subsequent Tukey's multiple comparisons test was performed. Note: CIA-BL, collagen-induced arthritis baseline; NS, (AspSerSer)<sub>6</sub>-liposome -NS siRNA; siRNA, (AspSerSer)<sub>6</sub>- liposome -*Plekho1* siRNA; TB, treatment begins; PIP, proximal interphalangeal.
